# Supplementary material for: A novel sulfonated prosthetic group for [18F]-radiolabelling and imparting water solubility of biomolecules and cyanine fluorophores
Source: Royal Society of Chemistry journal article supplement (doi:10.1039/c2ob26659h), 2012-11-30
Supplement: c2ob26659h.pdf [file c2ob26659h.pdf]

# A Novel Sulfonated Prosthetic Group for [<sup>18</sup>F]-Radiolabelling and Imparting Water Solubility of Biomolecules and Cyanine Fluorophores

Thomas Priem,<sup>a,b</sup> Cédric Bouteiller,<sup>\*a</sup> Davide Camporese,<sup>a</sup> Xavier Brune,<sup>b</sup> Julie Hardouin,<sup>e</sup> Anthony Romieu,<sup>\*b,c,d</sup> and Pierre-Yves Renard<sup>\*b,c,d</sup>

<sup>a</sup>Advanced Accelerator Applications, 20 Rue Diesel, 01630 Saint-Genis-Pouilly, France,  
Fax: +33-4-50-99-30-71

Phone: +33 (0)4 50 99 30 70

E-mail: [cedric.bouteiller@adacap.com](mailto:cedric.bouteiller@adacap.com)

Web site: <http://www.adacap.com>

<sup>b</sup>Université de Rouen, Laboratory COBRA UMR 6014 & FR 3038, IRCOF, 1 Rue Tesnière,  
76821 Mont St Aignan Cedex - France

Fax: + 33 (0)2 35 52 29 71

Phone: + 33 (0)2 35 52 24 76 (or 24 27)

E-mail: [pierre-yves.renard@univ-rouen.fr](mailto:pierre-yves.renard@univ-rouen.fr) or [anthony.romieu@univ-rouen.fr](mailto:anthony.romieu@univ-rouen.fr)

Web: <http://ircof.crihan.fr> (Thématique Bioorganique)

<sup>c</sup>INSA de Rouen, Avenue de l'Université, 76800 St Etienne du Rouvray - France

<sup>d</sup>CNRS Délégation Normandie, 14 Rue Alfred Kastler, 14052 Caen Cedex – France

<sup>e</sup>Laboratory PBS UMR 6270, Bât. Chimie, 76821 Mont St Aignan Cedex - France

## Supporting Information

|                                                                                                                                                     |     |
|-----------------------------------------------------------------------------------------------------------------------------------------------------|-----|
| Abbreviations .....                                                                                                                                 | S3  |
| Experimental Section .....                                                                                                                          | S3  |
| <sup>1</sup> H NMR spectrum of sultone-benzoic acid, <i>tert</i> -butyl ester 2 recorded in CDCl <sub>3</sub> at 300 MHz.<br>.....                  | S6  |
| <sup>13</sup> C NMR spectrum of sultone-benzoic acid, <i>tert</i> -butyl ester 2 recorded in CDCl <sub>3</sub> at 75.5 MHz.<br>.....                | S6  |
| RP-HPLC elution profile (system A) of sultone-benzoic acid, <i>tert</i> -butyl ester 2. ....                                                        | S7  |
| (ESI-) mass spectrum of sultone-benzoic acid, <i>tert</i> -butyl ester 2. ....                                                                      | S7  |
| (ESI-) mass spectrum (high resolution) of sultone-benzoic acid, <i>tert</i> -butyl ester 2. ....                                                    | S8  |
| <sup>1</sup> H NMR spectrum of mono-fluoro sulfonated <i>tert</i> -butyl ester 3 recorded in CD <sub>3</sub> OD at 300 MHz. <sup>a</sup> .....      | S8  |
| <sup>13</sup> C NMR spectrum of mono-fluoro sulfonated <i>tert</i> -butyl ester 3 recorded in CD <sub>3</sub> OD at 75.5 MHz. <sup>a</sup> .....    | S9  |
| RP-HPLC elution profile (system A) of mono-fluoro sulfonated <i>tert</i> -butyl ester 3. ....                                                       | S10 |
| (ESI-) mass spectrum of mono-fluoro sulfonated <i>tert</i> -butyl ester 3. ....                                                                     | S10 |
| <sup>1</sup> H NMR spectrum of mono-fluoro-sulfonated benzoic acid 4 recorded in CD <sub>3</sub> OD at 300 MHz.....                                 | S11 |
| <sup>13</sup> C NMR spectrum of mono-fluoro-sulfonated benzoic acid 4 recorded in CD <sub>3</sub> OD at 75.5 MHz.....                               | S11 |
| <sup>19</sup> F NMR spectrum of mono-fluoro-sulfonated benzoic acid 4 recorded in CD <sub>3</sub> OD at 282.5 MHz.....                              | S12 |
| RP-HPLC elution profile (system A) of mono-fluoro-sulfonated benzoic acid 4. ....                                                                   | S12 |
| (ESI-) mass spectrum of mono-fluoro-sulfonated benzoic acid 4.....                                                                                  | S13 |
| (ESI-) mass spectrum of [ <sup>19</sup> F]-prosthetic group 1.....                                                                                  | S13 |
| (ESI-) mass spectrum (high resolution) of mono-fluoro sulfonated benzoic acid 4.....                                                                | S14 |
| <sup>1</sup> H NMR spectrum of cyanine amino-amide 6 (TFA salt) recorded in CDCl <sub>3</sub> at 200 MHz. .                                         | S14 |
| <sup>13</sup> C NMR spectrum of cyanine amino-amide 6 (TFA salt) recorded in CDCl <sub>3</sub> at 75.5 MHz.<br>.....                                | S15 |
| RP-HPLC elution profile (system S1) of cyanine amino-amide 6.....                                                                                   | S15 |
| (ESI+) mass spectrum of cyanine amino-amide 6. ....                                                                                                 | S16 |
| (ESI+) mass spectrum (high resolution) of cyanine amino-amide 6.....                                                                                | S16 |
| Normalised absorption (—), emission (—) (Ex. 600 nm) and excitation (—) (Em. 760 nm) spectra of cyanine amino-amide 6 in DMSO at 25 °C.....         | S17 |
| Normalised absorption (—), emission (—) (Ex. 600 nm) and excitation (—) (Em. 760 nm) spectra of cyanine amino-amide 6 in PBS + 5% BSA at 25 °C..... | S17 |

|                                                                                                                                              |     |
|----------------------------------------------------------------------------------------------------------------------------------------------|-----|
| <sup>1</sup> H NMR spectrum of fluoro-monosulfonated cyanine “cold” reference 7 (TFA salt) recorded in CDCl <sub>3</sub> at 300 MHz. ....    | S18 |
| <sup>13</sup> C NMR spectrum of fluoro-monosulfonated cyanine “cold” reference 7 (TFA salt) recorded in CDCl <sub>3</sub> at 75.5 MHz. ....  | S19 |
| <sup>19</sup> F NMR spectrum of fluoro-monosulfonated cyanine “cold” reference 7 (TFA salt) recorded in CDCl <sub>3</sub> at 282.5 MHz. .... | S19 |
| RP-HPLC elution profile (system B) of fluoro-monosulfonated cyanine “cold” reference 7. ....                                                 | S20 |
| RP-HPLC elution profile (system I) of fluoro-monosulfonated cyanine “cold” reference 7. ....                                                 | S20 |
| (ESI-) mass spectrum of fluoro-monosulfonated cyanine “cold” reference 7. ....                                                               | S21 |
| (ESI+) mass spectrum of fluoro-monosulfonated cyanine “cold” reference 7. ....                                                               | S21 |
| (ESI+) mass spectrum (high resolution) of fluoro-monosulfonated cyanine “cold” reference 7. ....                                             | S22 |
| RP-HPLC elution profile (system A) of fluoro-monosulfonated dodecapeptide “cold” reference 8. ....                                           | S22 |
| RP-HPLC elution profile (system I) of fluoro-monosulfonated dodecapeptide “cold” reference 8. ....                                           | S23 |
| (ESI+) mass spectrum of fluoro-monosulfonated dodecapeptide “cold” reference 8. ....                                                         | S23 |
| (ESI-) mass spectrum of fluoro-monosulfonated dodecapeptide “cold” reference 8. ....                                                         | S24 |
| (ESI+) mass spectrum (high resolution) of fluoro-monosulfonated dodecapeptide “cold” reference 8. ....                                       | S24 |
| (ESI+) mass spectrum of dodecapeptide before derivatisation with [ <sup>19</sup> F]-prosthetic group 1 <sup>a</sup> . ....                   | S25 |

## Abbreviations

The following abbreviations are used throughout the text of the ESI file: Boc<sub>2</sub>O, di-*tert*-butyl dicarbonate; BSA, bovine serum albumin protein; DIEA, *N,N*-diisopropylethylamine; DMF, *N,N*-dimethylformamide; DMSO, dimethylsulfoxide; ESI, electrospray ionisation; PBS, phosphate buffered saline; RP-HPLC, reversed-phase high performance liquid chromatography; TFA, trifluoroacetic acid; TLC, thin-layer chromatography.

## Experimental Section

Pyridine was dried through distillation over KOH and stored over BaO and under an Ar atmosphere. Flash column chromatography purifications of cyanine derivatives were performed on Geduran<sup>®</sup> Si 60 silica gel (63-200 μm) from Merck.

## Instruments and methods.

<sup>1</sup>H, <sup>13</sup>C and <sup>19</sup>F spectra were recorded either with a Bruker DPX 300 spectrometer (Bruker, Wissembourg, France) or with a Bruker AC 200. Chemical shifts are expressed in parts per million (ppm) from CDCl<sub>3</sub> (δ<sub>H</sub> = 7.26, δ<sub>C</sub> = 77.16) or CD<sub>3</sub>OD (δ<sub>H</sub> = 3.31, δ<sub>C</sub> = 49.0)<sup>1</sup>. *J* values are expressed in Hz. <sup>13</sup>C substitutions were determined with DEPT-135 experiments, differentiating signals of methyl and methine carbons pointing "up" (+) from methylene carbons pointing "down" (-). Analytical HPLC was performed on a Thermo Scientific Surveyor Plus instrument equipped with a PDA detector. Semi-preparative HPLC was performed on a Thermo Scientific SPECTRASYSYSTEM liquid chromatography system (P4000) equipped with a UV-visible 2000 detector. Low-resolution mass spectra were obtained with a Finnigan LCQ Advantage MAX (ion trap) apparatus equipped with an electrospray source. High-resolution mass spectra (HRMS) were recorded on a LTQ Orbitrap Elite (Fisher Scientific). UV-visible absorption spectra were obtained on a Varian Cary 50 scan spectrophotometer by using a rectangular quartz cell (Varian, standard cell, Open Top, 10 × 10 mm, 3.5 mL). Fluorescence spectroscopic studies (emission/excitation spectra) were performed on a Varian Cary Eclipse spectrophotometer with a semi-micro quartz fluorescence cell (Hellma, 104F-QS, 10 × 4 mm, 1400 μL). The absorption spectra of cyanine dyes were recorded (400-900 nm) in DMSO, PBS and PBS + 5% BSA (concentration: 1.0-10.0 μM) at 25 °C. Excitation/emission spectra were recorded under the same conditions after emission/excitation at the corresponding wavelength (760/600 nm, excitation and emission filters: auto, excitation and emission slit = 5 nm). All fluorescence spectra were corrected. Relative quantum yields were measured at 25 °C by a relative method using symmetrical sulfobenzocyanine dye Cy 5.5 (Cy5.205) as a standard (Φ<sub>F</sub> = 23% in PBS)<sup>2</sup>. The following equation was used to determine the relative fluorescence quantum yield:

$$\Phi_F(x) = (A_s/A_x)(F_x/F_s)(n_x/n_s)^2 \Phi_F(s)$$

Where A is the absorbance (in the range 0.01-0.1 A.U.), F is the area under the emission curve, n is the refractive index of the solvents (at 25 °C) used in measurements, and the subscripts s and x represent standard and unknown, respectively. The following refractive index values were used: 1.479 for DMSO and 1.337 for PBS and PBS + 5% BSA.

<sup>1</sup> G. R. Fulmer, A. J. M. Miller, N. H. Sherden, H. E. Gottlieb, A. Nudelman, B. M. Stoltz, J. E. Bercaw and K. I. Goldberg, *Organometallics*, 2010, **29**, 2176-2179.

<sup>2</sup> S. R. Mujumdar, R. B. Mujumdar, C. M. Grant and A. S. Waggoner, *Bioconjugate Chem.*, 1996, **7**, 356-362.



### HPLC separations.

The following chromatographic system was used for the analytical experiments:

- System S1: RP-HPLC (Thermo Hypersil GOLD C<sub>18</sub> column, 5 μm, 2.1 × 100 mm) with CH<sub>3</sub>CN and aq. 0.1% trifluoroacetic acid (aq. TFA 0.1%, pH 2.0) as eluents [80% TFA (5 min), then linear gradient from 20 to 40% (5 min) and 40 to 100% (50 min) of CH<sub>3</sub>CN] at a flow rate of 0.25 mL min<sup>-1</sup>. UV-vis detection with the "Max Plot" (*i.e.*, chromatogram at absorbance maximum for each compound) mode (220-798 nm).

### Cyanine amino-amide (6):

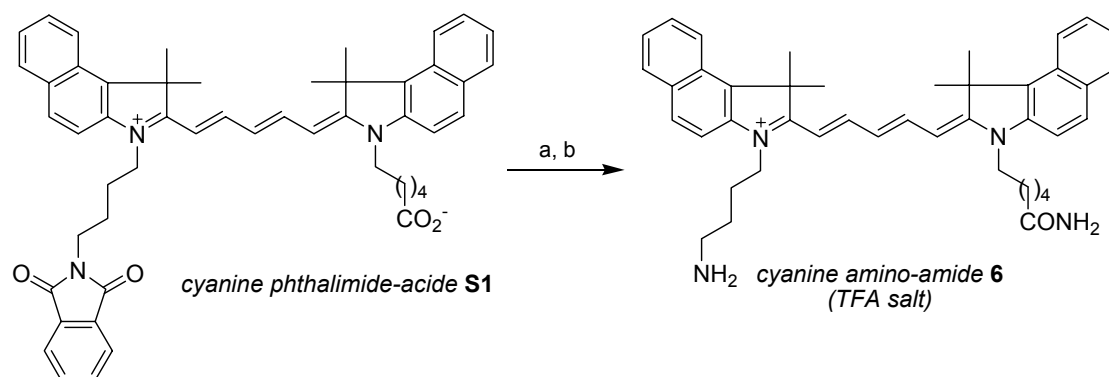

**Scheme S1** Reagents and conditions: (a) Boc<sub>2</sub>O (3 equiv.), NH<sub>4</sub>HCO<sub>3</sub> (3 equiv.), pyridine, DMF, rt, overnight, 89%; (b) CH<sub>3</sub>NH<sub>2</sub> (6 equiv.), CH<sub>3</sub>OH-H<sub>2</sub>O (88 : 12, v/v), rt, 24 h, RP-C<sub>18</sub> flash-chromatography, 37%.

Amide formation: Cyanine phthalimide-acide<sup>3</sup> **1** (596 mg, 0.77 mmol, 1 equiv.) was dissolved in dry DMF (26.7 mL) and mixed with a heterogeneous DMF solution (14.3 mL) containing NH<sub>4</sub>HCO<sub>3</sub> (185.6 mg, 2.35 mmol, 3 equiv.), dry pyridine (187 μL, 2.32 mmol, 3 equiv.) and Boc<sub>2</sub>O (512 mg, 2.35 mmol, 3 equiv.). The resulting reaction mixture was protected from light (with aluminum foil) and stirred at rt overnight. The complete conversion into the carboxamide derivative was confirmed both by TLC (CH<sub>2</sub>Cl<sub>2</sub>-CH<sub>3</sub>OH, 9 : 1, v/v) and ESI mass spectrometric analyses. Thereafter, the reaction mixture was evaporated to dryness and the resulting oily residue was purified by flash-chromatography on a silica gel column with a step gradient of CH<sub>3</sub>OH (0-1%) in CH<sub>2</sub>Cl<sub>2</sub> (stabilised with 1% ethanol) as the mobile phase. The desired cyanine phthalimide-amide was obtained as a blue amorphous solid (525 mg, yield 89%). Its purity was checked by RP-HPLC (system S1) and this product was directly engaged in the next step without further purification. *R*<sub>f</sub> 0.34 (CH<sub>2</sub>Cl<sub>2</sub>-CH<sub>3</sub>OH, 9 : 1, v/v); HPLC (system S1): *t*<sub>R</sub> = 32.6 min, purity 98%; MS (ESI<sup>+</sup>): *m/z* 769.40 [M]<sup>+</sup>, calcd for C<sub>51</sub>H<sub>53</sub>N<sub>4</sub>O<sub>3</sub><sup>+</sup> 769.41.

Removal of phthalimide: Phthalimide derivative (442 mg, 0.57 mmol, 1 equiv.) was dissolved in CH<sub>3</sub>OH (20 mL) and 35% aq. methylamine solution (2.75 mL, 3.4 mmol, 6 equiv.) was added; the resulting reaction mixture was protected from light (with aluminum foil) and stirred at rt for 24 h. The complete conversion into the amino-amide derivative was confirmed both by TLC (CH<sub>2</sub>Cl<sub>2</sub>-CH<sub>3</sub>OH, 9 : 1, v/v) and ESI mass spectrometric analyses. Thereafter, the reaction mixture was evaporated to dryness; the resulting oily residue was dissolved in a

<sup>3</sup> B. Chipon, G. Clavé, C. Bouteiller, M. Massonneau, P.-Y. Renard and A. Romieu, *Tetrahedron Lett.*, 2006, **47**, 8279-8284. Corrigendum, 2007, **48**, 501.

mixture of CH<sub>3</sub>CN and aq. TFA 0.1% and purified on a KP-C18-HS SNAP cartridge (30 g, Biotage<sup>®</sup>) by means of an automated flash purification system (Biotage<sup>®</sup> Isolera One), and by using a linear gradient from 0 to 75% (80 min) of CH<sub>3</sub>CN in aq. TFA 0.1% as the mobile phase (flow rate 25 mL min<sup>-1</sup> and UV detection at 254/280 nm). The product-containing fractions were lyophilised to give the TFA salt of cyanine amino-amide **6** as a blue amorphous powder (206 mg, 0.21 mmol, yield 37%). *Please note: Hydrazine monohydrate can be used as alternative deblocking reagent. Reaction kinetics is faster but traces of diimide (N<sub>2</sub>H<sub>2</sub>) may cause partial or complete degradation of the cyanine core through reduction of its polymethine chain especially if the crude reaction mixture is slightly heated (ca. 40 °C) during the evaporation step.* *R<sub>f</sub>* 0.0 (CH<sub>2</sub>Cl<sub>2</sub>-CH<sub>3</sub>OH, 9 : 1, v/v); δ<sub>H</sub>(200 MHz, CDCl<sub>3</sub>) 8.42 (bs, 3H, NH<sub>3</sub><sup>+</sup>), 8.06-7.31 (14H, m, Ph-benzoindole & 2 × CH=CH-CH=C), 6.65 (1H, t, *J* 12.4, CH=CH-CH=C), 6.18 (2H, pt, *J* 14.0, 2 × CH=CH-CH=C), 4.03 (4H, bm, 2 × N(benzoindole)-CH<sub>2</sub>), 3.09 (2H, bm, CH<sub>2</sub>-NH<sub>3</sub><sup>+</sup>), 2.25 (2H, bm, CH<sub>2</sub>-CONH<sub>2</sub>), 1.92-1.25 (22H, m, 4 × CH<sub>3</sub>(benzoindole) & 5 × -CH<sub>2</sub>-); δ<sub>C</sub>(75.5 MHz, CDCl<sub>3</sub>) 24.8 (CH<sub>2</sub>), 24.9 (CH<sub>2</sub>), 25.2 (CH<sub>2</sub>), 26.4 (CH<sub>2</sub>), 27.4 (CH<sub>2</sub>), 27.7 (4 × CH<sub>3</sub>), 35.4 (CH<sub>2</sub>), 39.4 (CH<sub>2</sub>), 43.9 (CH<sub>2</sub>), 44.3 (CH<sub>2</sub>), 51.2 (2 × C(CH<sub>3</sub>)<sub>2</sub>), 103.4 (2 × CH), 110.7 (2 × CH), 116.8 (1C, *J* 292.3, CF<sub>3</sub>-TFA), 122.3 (2 × CH), 125.2 (CH), 125.3 (CH), 126.4 (CH), 127.9 (2 × CH), 128.0 (2 × Cq), 130.3 (2 × CH), 131.0 (2 × CH), 132.0 (2 × Cq), 133.8 (1 × Cq), 134.0 (1 × Cq), 139.4 (2 × Cq), 152.1 (2 × CH), 161.5 (1C, q, CO<sub>2</sub>H-TFA), 174.0 (1 × CH), 174.1 (1 × CH), 177.7 (1 × Cq, CONH<sub>2</sub>); HPLC (system S1): *t<sub>R</sub>* = 21.3 min, purity 96%; MS (ESI<sup>+</sup>): *m/z* 320.27 [M + H]<sup>2+</sup>, 639.40 [M]<sup>+</sup>, calcd for C<sub>43</sub>H<sub>51</sub>N<sub>4</sub>O<sup>+</sup> 639.40; HRMS (ESI<sup>+</sup>): *m/z* 320.2061 [M + H]<sup>2+</sup>, calcd for (C<sub>43</sub>H<sub>52</sub>N<sub>4</sub>O<sup>2+</sup>)/2 320.2070; λ<sub>max</sub>(DMSO) nm 688 (ε/dm<sup>3</sup> mol<sup>-1</sup>cm<sup>-1</sup> 195 000), λ<sub>max</sub> em (DMSO) nm 712 (Φ<sub>F</sub> 0.45); λ<sub>max</sub>(PBS + 5% BSA) nm 695 (ε/dm<sup>3</sup> mol<sup>-1</sup>cm<sup>-1</sup> 162 000), λ<sub>max</sub> em (PBS + 5% BSA) nm 710 (Φ<sub>F</sub> 0.34).

**<sup>1</sup>H NMR spectrum of sultone-benzoic acid, *tert*-butyl ester 2 recorded in CDCl<sub>3</sub> at 300 MHz.**

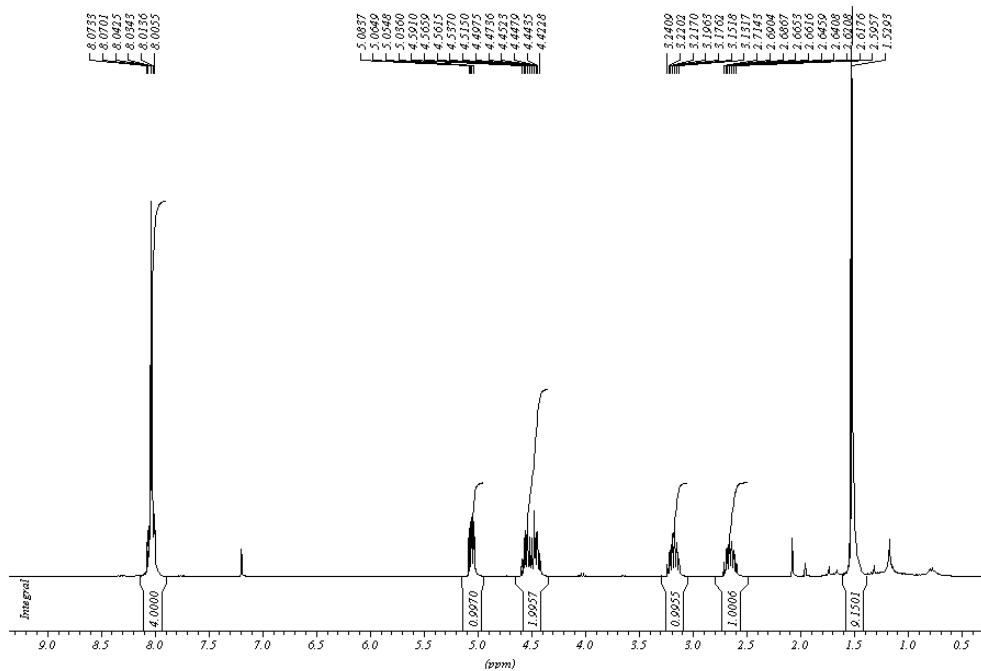

**<sup>13</sup>C NMR spectrum of sultone-benzoic acid, *tert*-butyl ester 2 recorded in CDCl<sub>3</sub> at 75.5 MHz.**

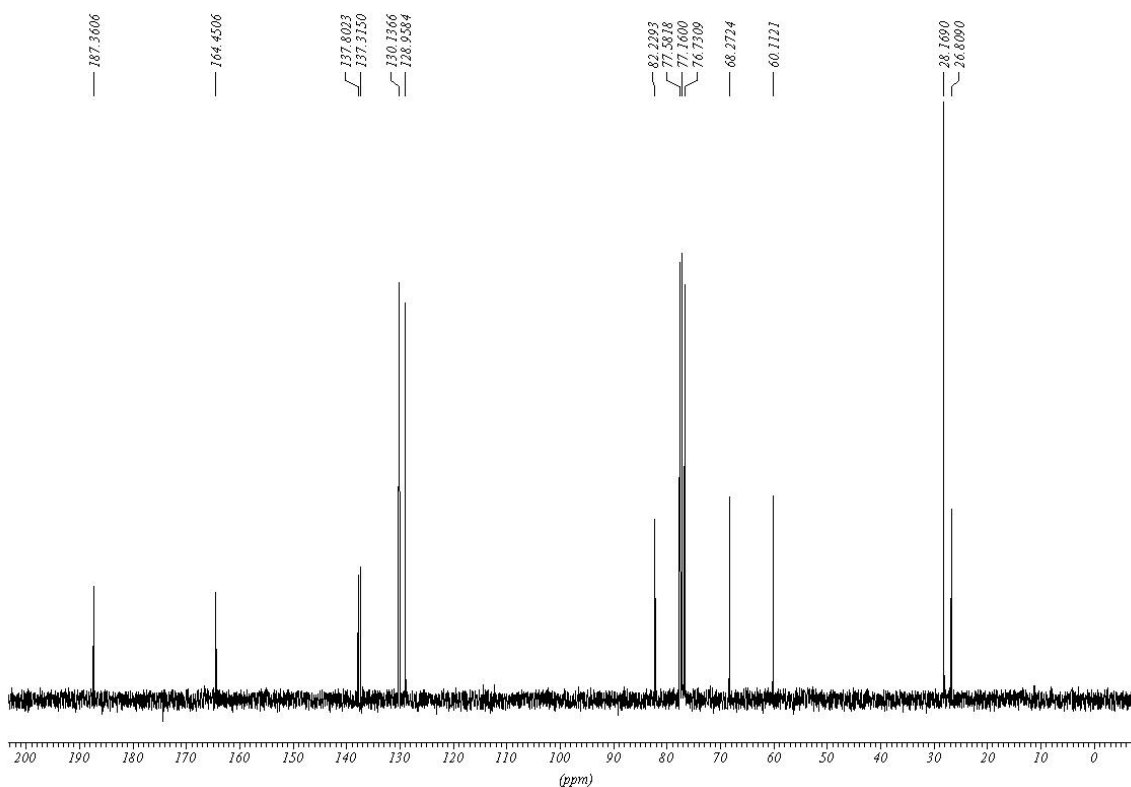

### RP-HPLC elution profile (system A) of sultone-benzoic acid, *tert*-butyl ester 2.

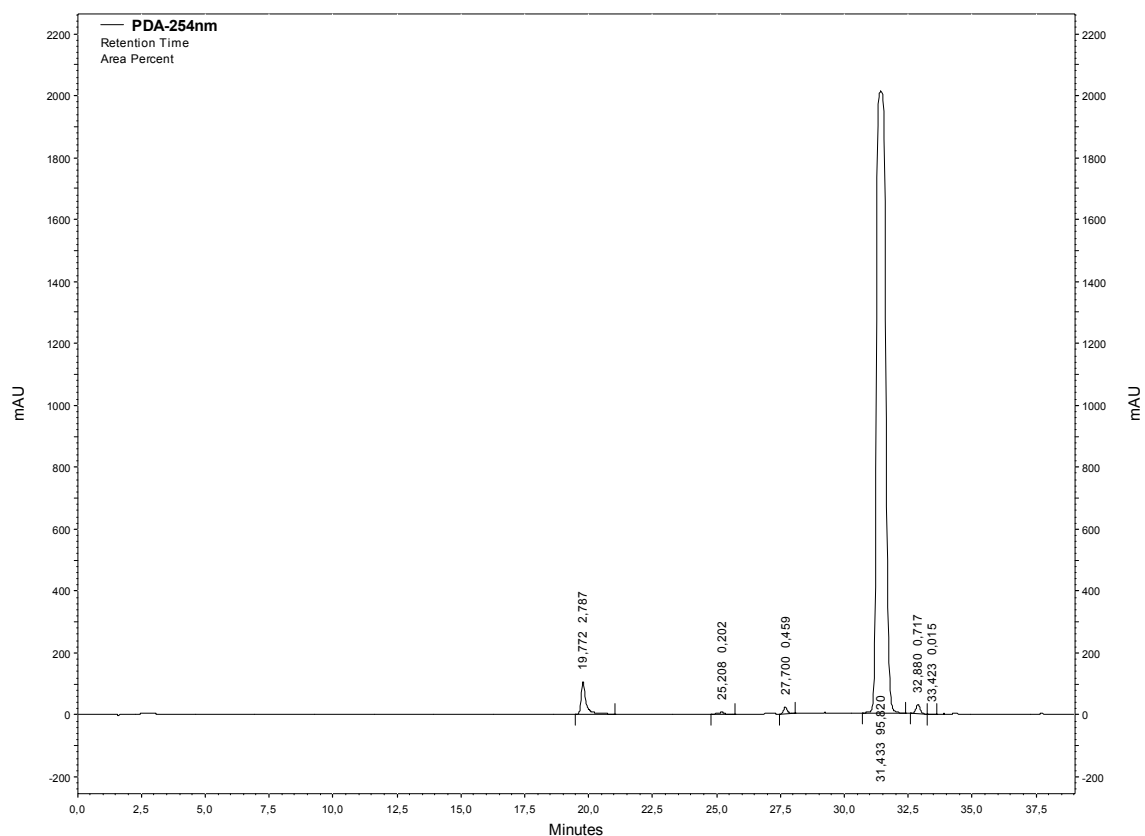

### (ESI-) mass spectrum of sultone-benzoic acid, *tert*-butyl ester 2.

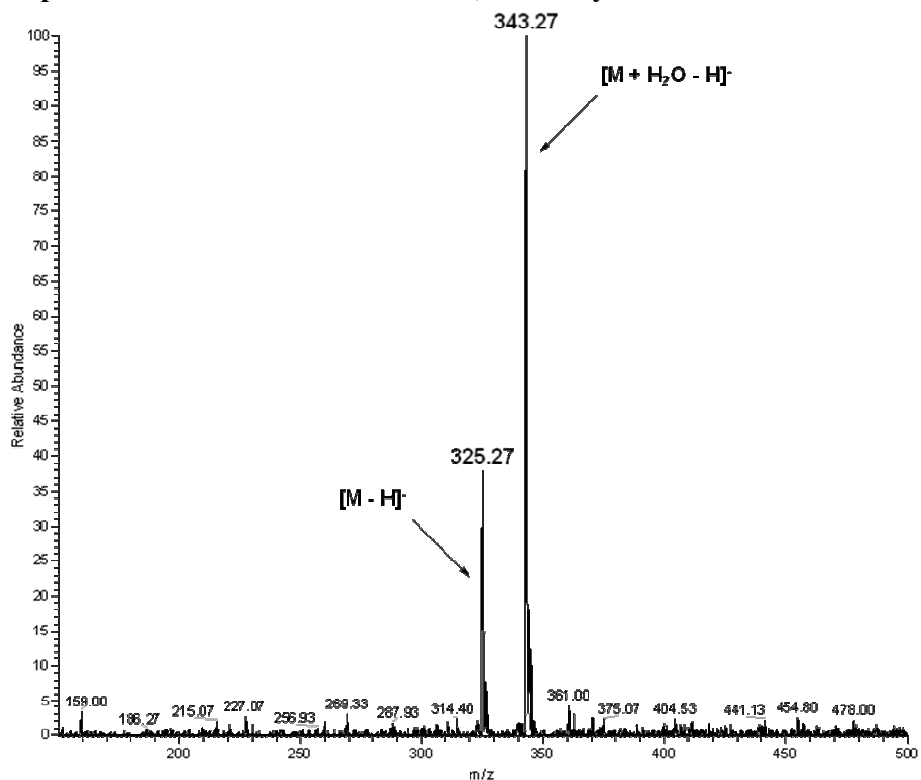

(ESI-) mass spectrum (high resolution) of sultone-benzoic acid, *tert*-butyl ester 2.

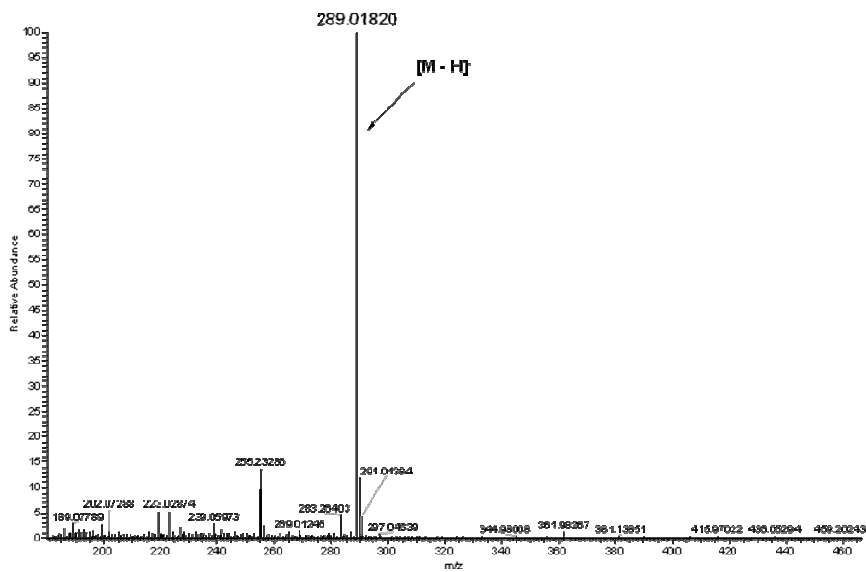

<sup>1</sup>H NMR spectrum of mono-fluoro sulfonated *tert*-butyl ester 3 recorded in CD<sub>3</sub>OD at 300 MHz.<sup>a</sup>

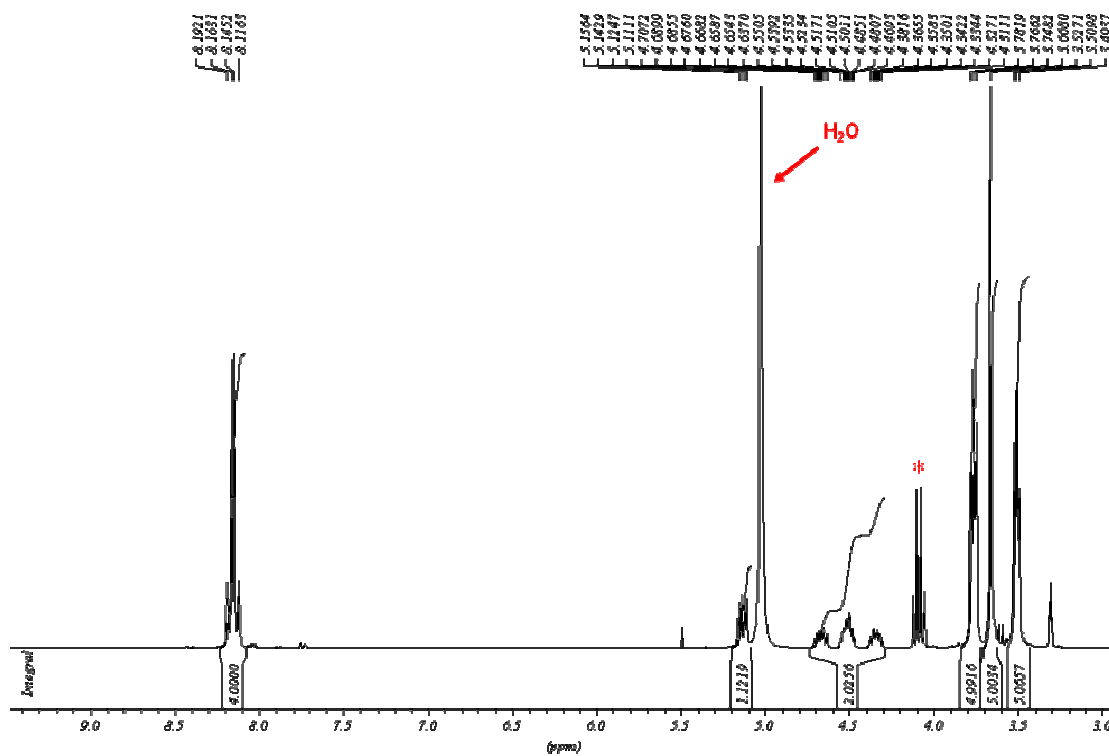

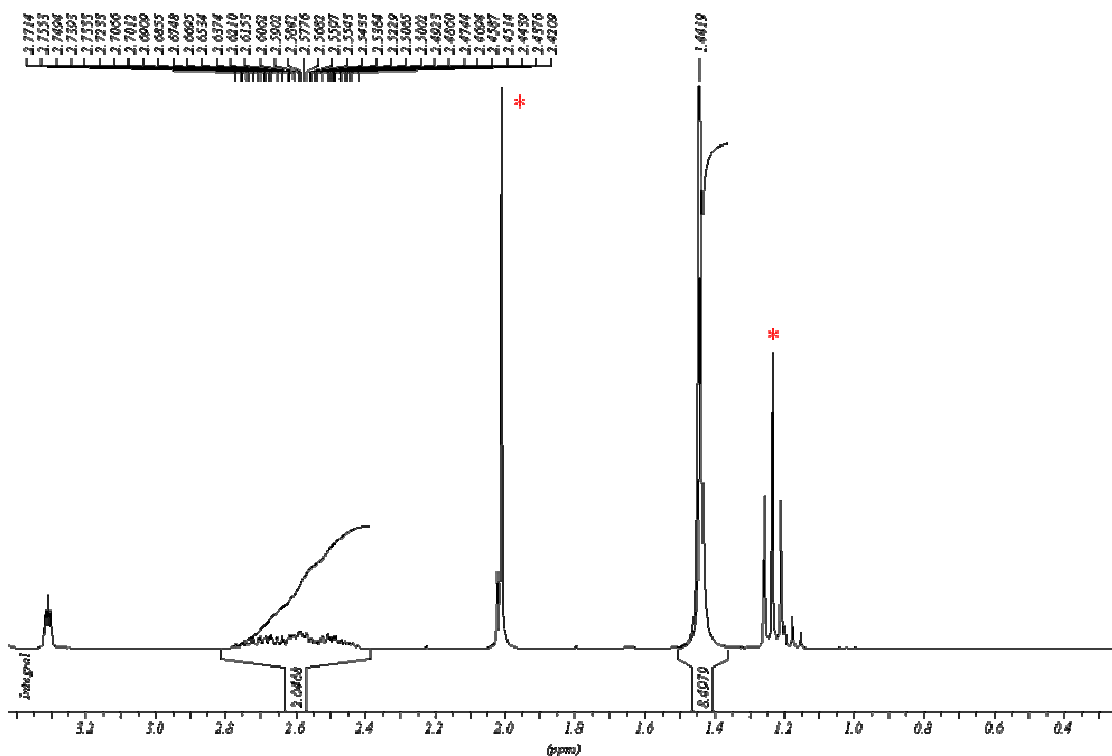

\*peaks assigned to residual ethyl acetate.

<sup>a</sup>This compound was partially obtained as the trialkylammonium (Kryptofix[K222]) salt (3-[K222], 1 : 0.4), 3.79-3.51 ppm: peaks assigned to Kryptofix.

<sup>13</sup>C NMR spectrum of mono-fluoro sulfonated *tert*-butyl ester 3 recorded in CD<sub>3</sub>OD at 75.5 MHz.<sup>a</sup>

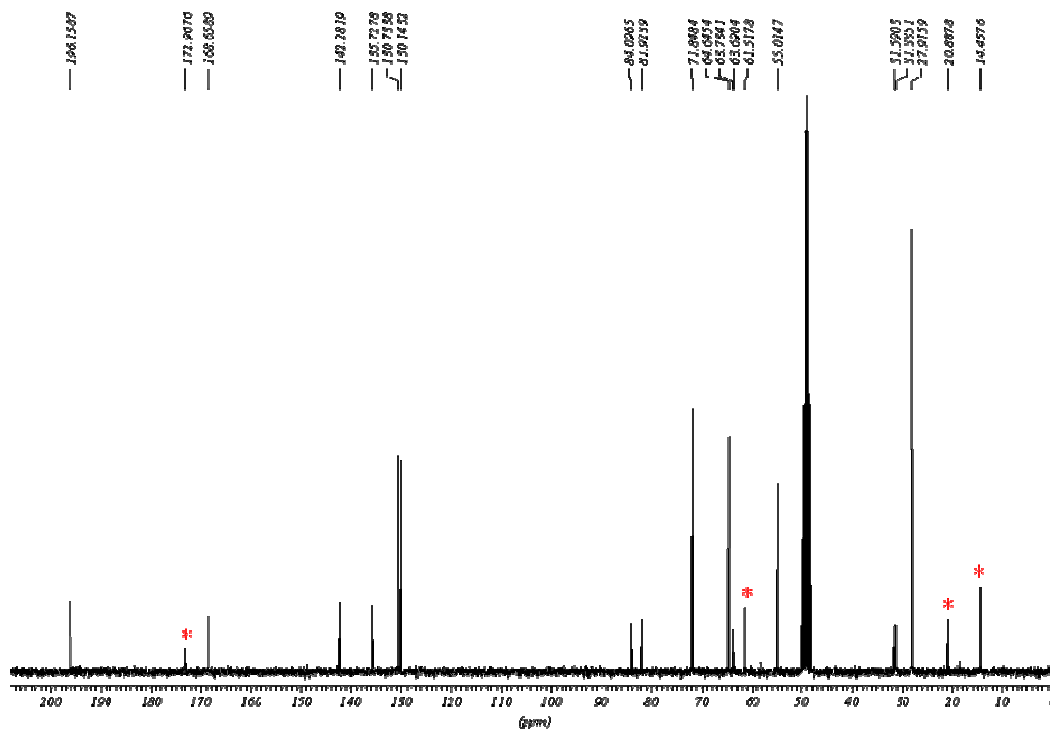

\*peaks assigned to residual ethyl acetate.

<sup>a</sup>This compound was partially obtained as the trialkylammonium (Kryptofix[K222]) salt (3-[K222], 1 : 0.4).

### RP-HPLC elution profile (system A) of mono-fluoro sulfonated *tert*-butyl ester 3.

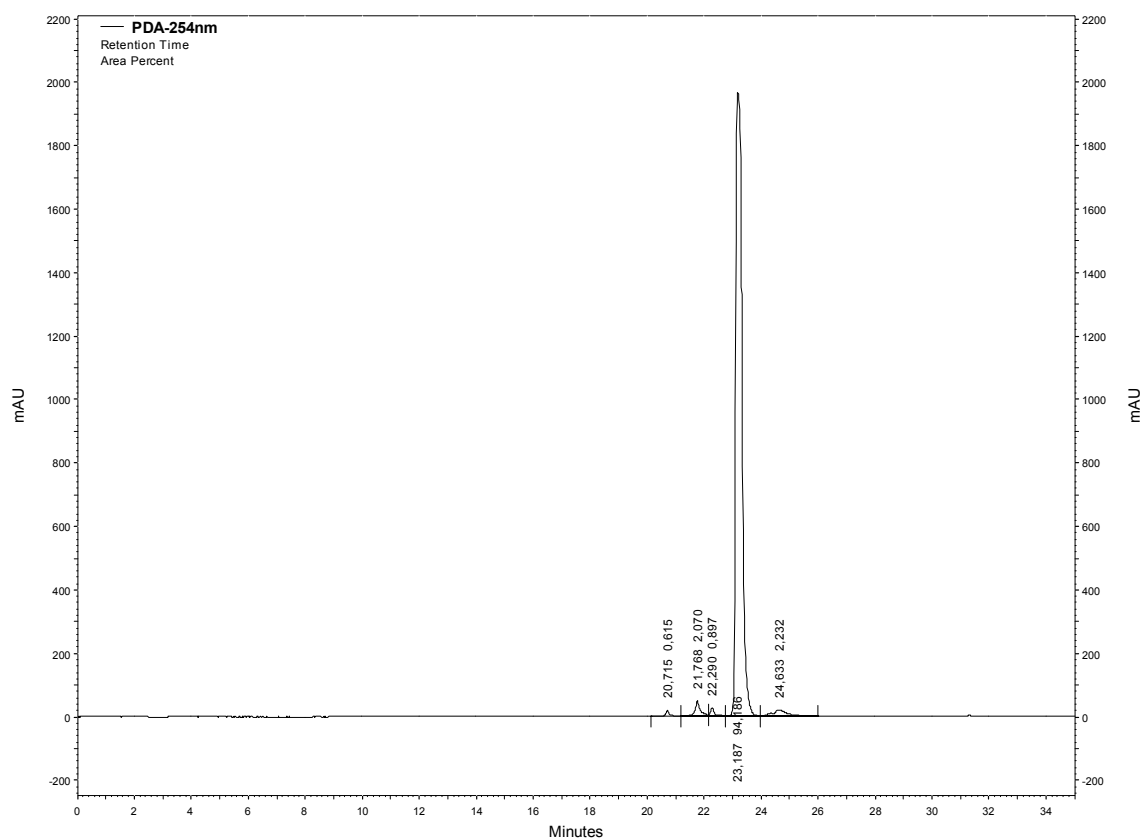

### (ESI-) mass spectrum of mono-fluoro sulfonated *tert*-butyl ester 3.

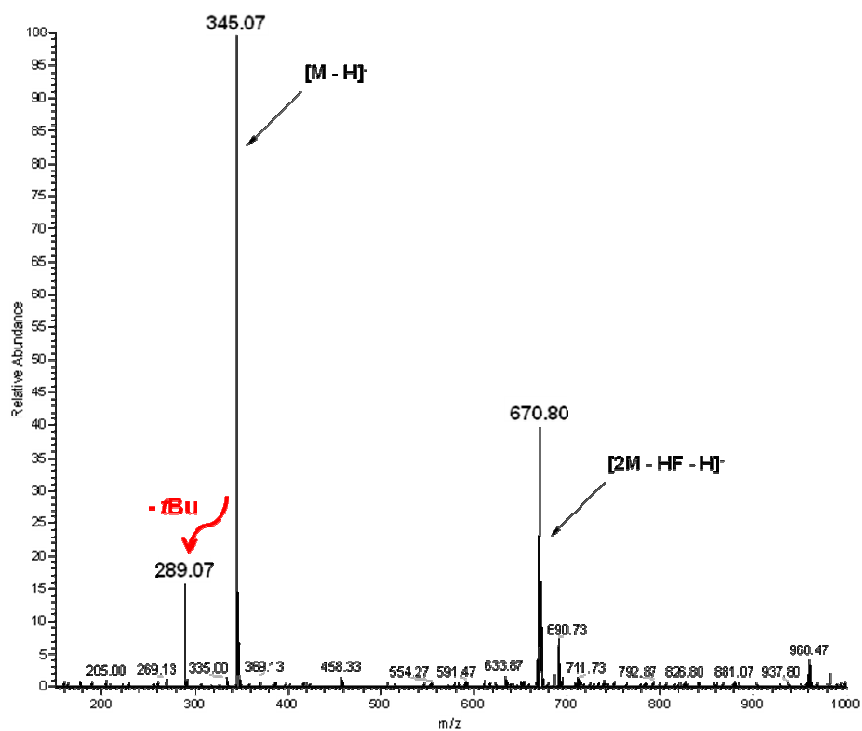

The peak at  $m/z = 289.07$  was assigned to the free carboxylic acid derivative whose formation occurred during the ionisation process.

**<sup>1</sup>H NMR spectrum of mono-fluoro-sulfonated benzoic acid 4 recorded in CD<sub>3</sub>OD at 300 MHz.**

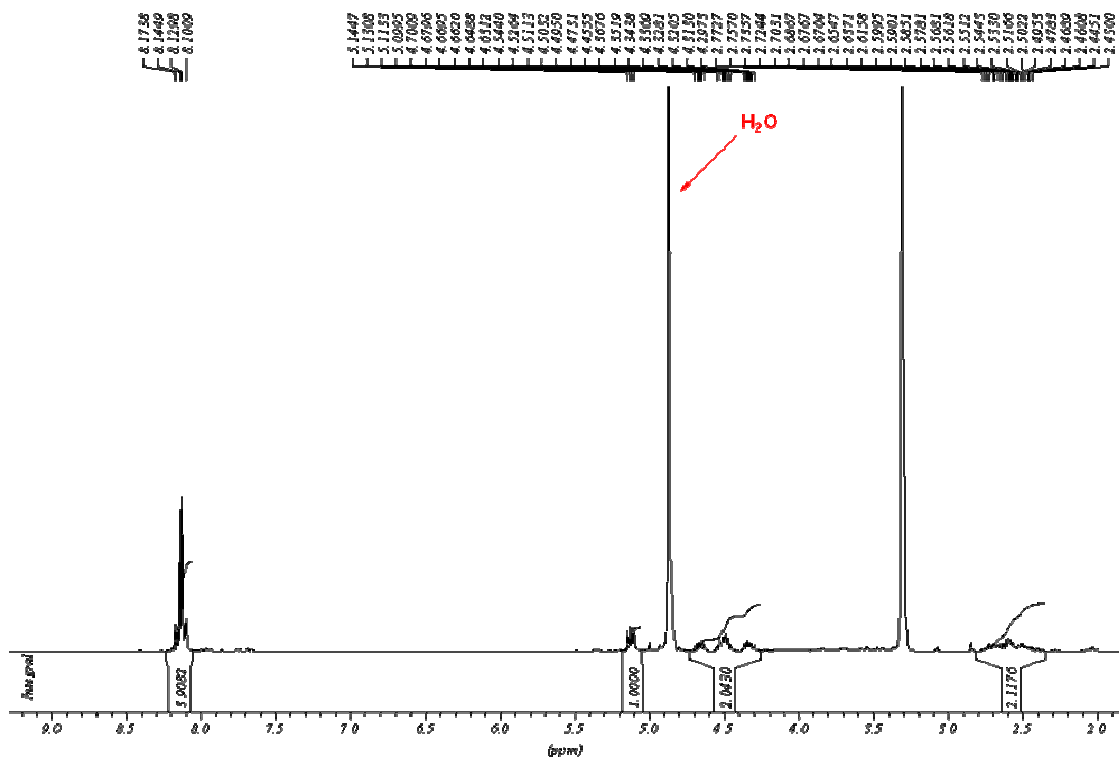

**<sup>13</sup>C NMR spectrum of mono-fluoro-sulfonated benzoic acid 4 recorded in CD<sub>3</sub>OD at 75.5 MHz.**

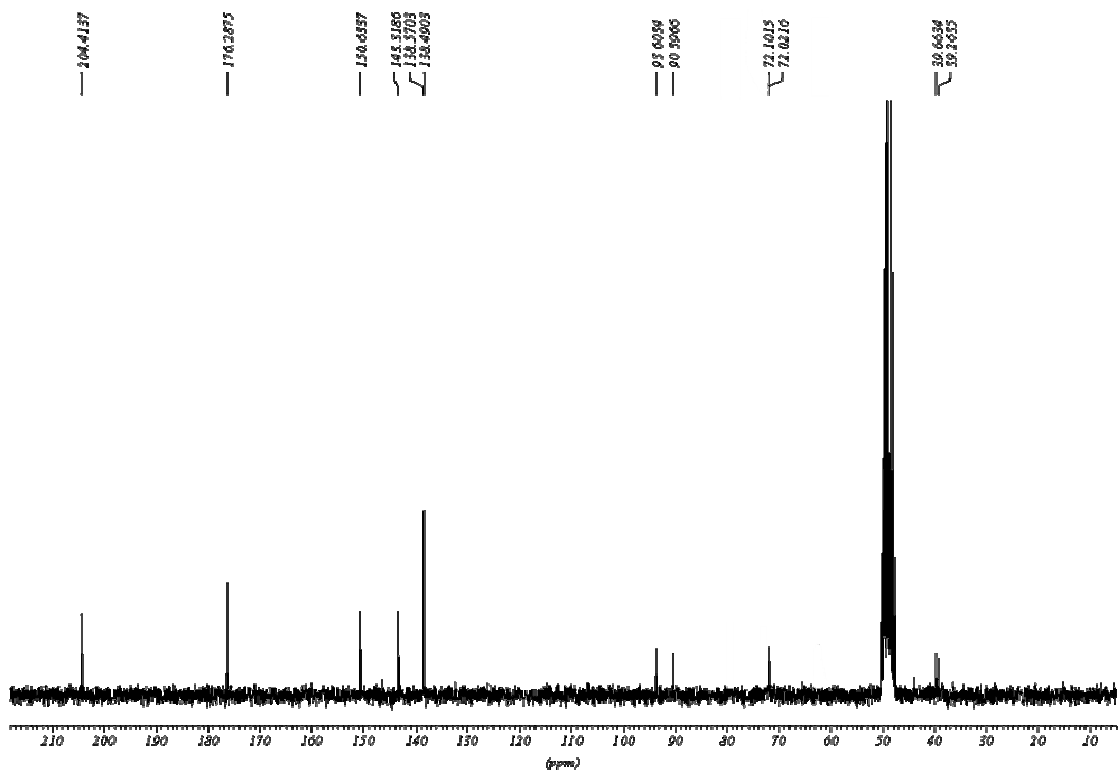



**$^{19}\text{F}$  NMR spectrum of mono-fluoro-sulfonated benzoic acid 4 recorded in  $\text{CD}_3\text{OD}$  at 282.5 MHz.**

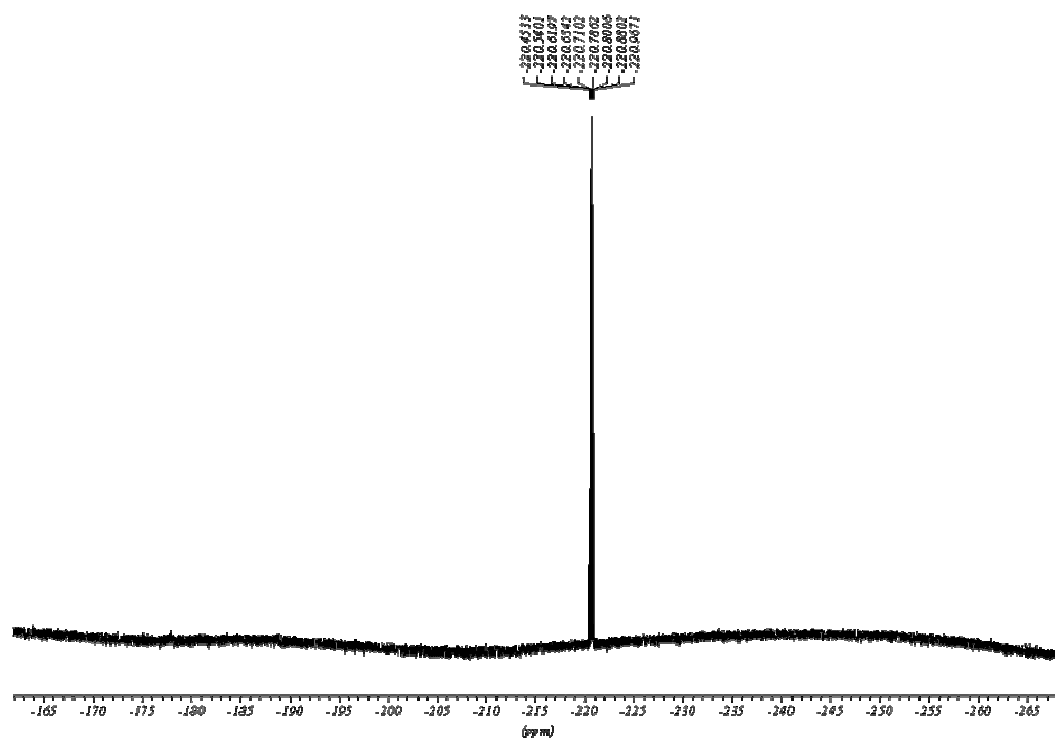

**RP-HPLC elution profile (system A) of mono-fluoro-sulfonated benzoic acid 4.**

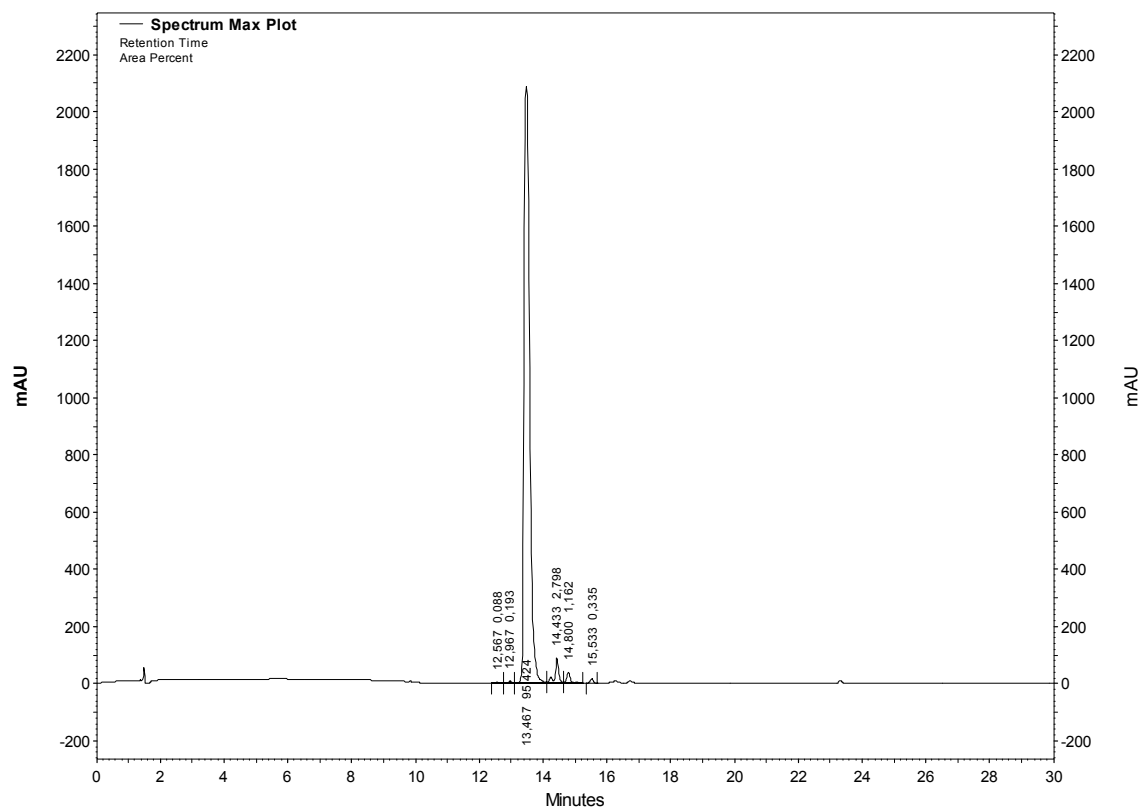

**(ESI-) mass spectrum of mono-fluoro-sulfonated benzoic acid 4.**

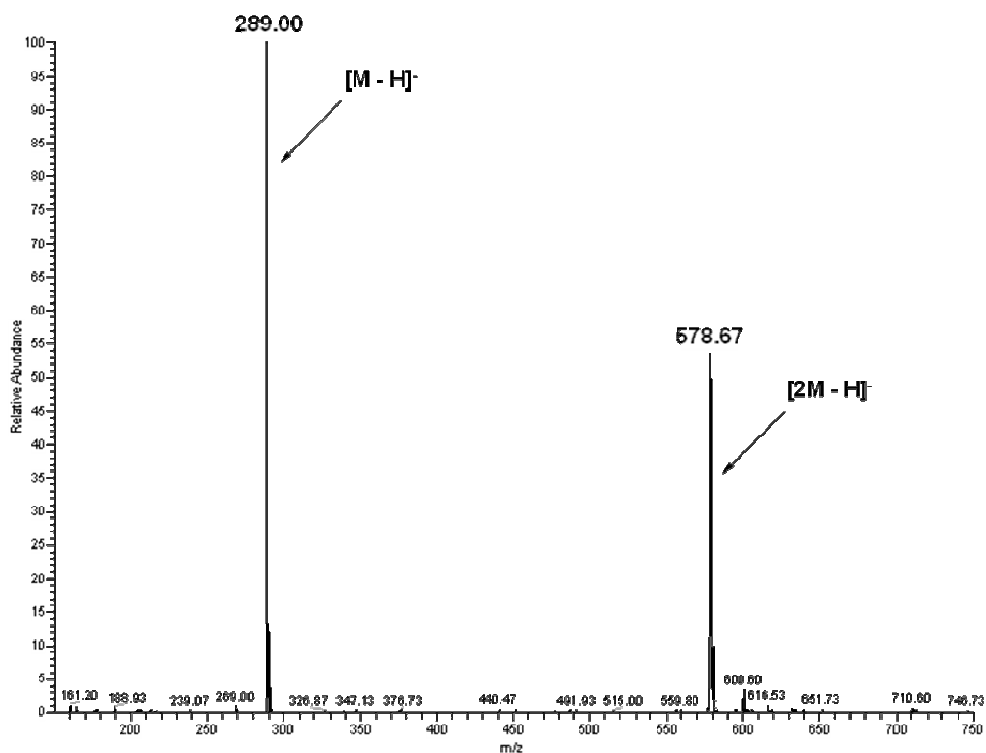

**(ESI-) mass spectrum of [<sup>19</sup>F]-prosthetic group 1.**

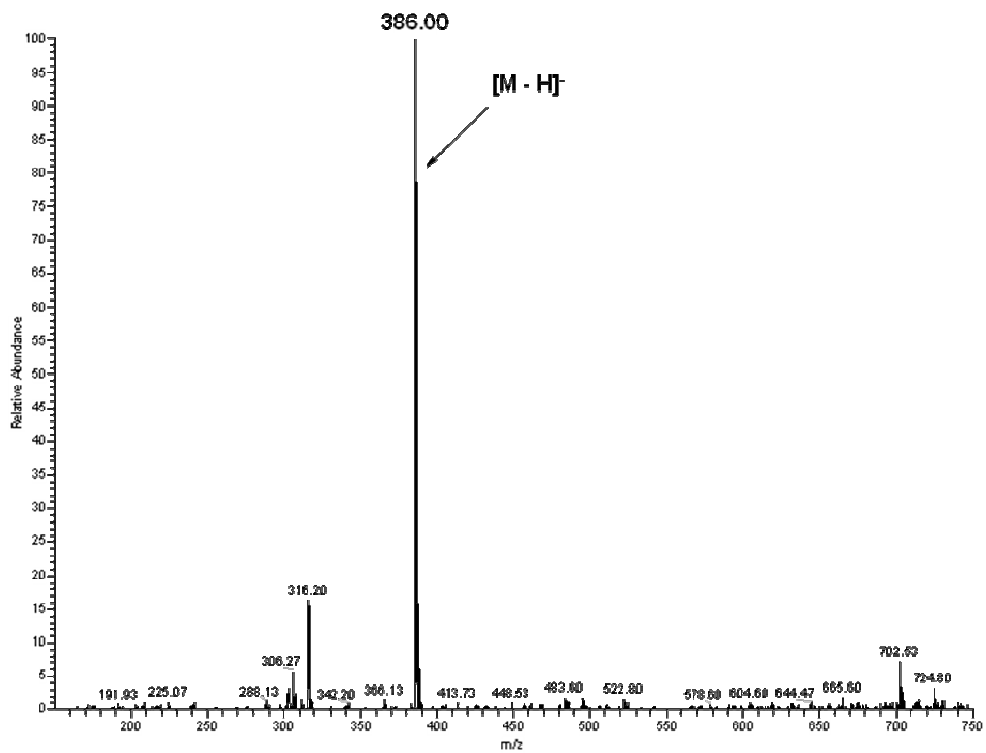

(ESI-) mass spectrum (high resolution) of mono-fluoro sulfonated benzoic acid 4.

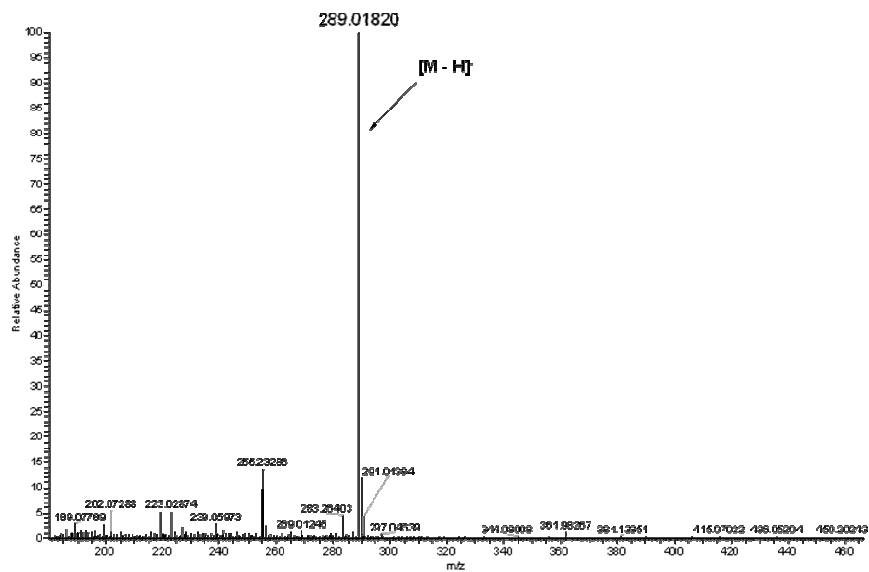

<sup>1</sup>H NMR spectrum of cyanine amino-amide 6 (TFA salt) recorded in CDCl<sub>3</sub> at 200 MHz.

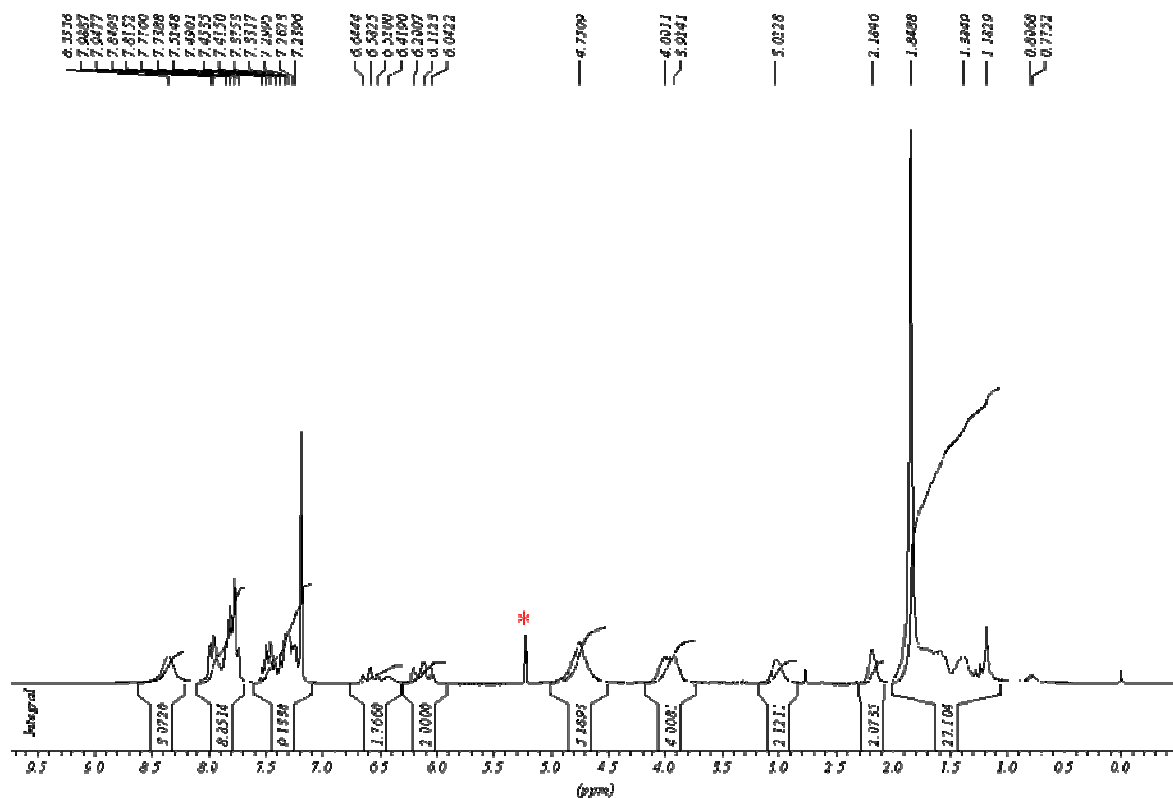

$^{13}\text{C}$  NMR spectrum of cyanine amino-amide 6 (TFA salt) recorded in  $\text{CDCl}_3$  at 75.5 MHz.

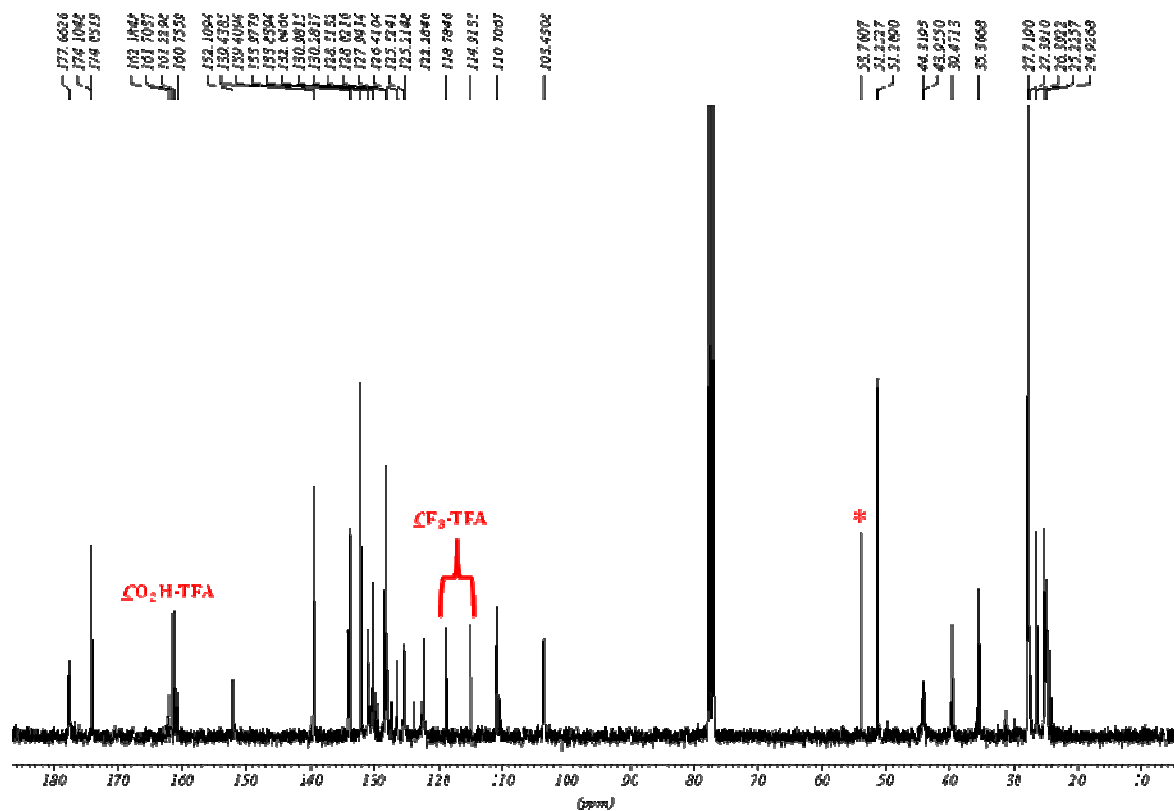

\*peaks assigned to residual  $\text{CH}_2\text{Cl}_2$ .

RP-HPLC elution profile (system S1) of cyanine amino-amide 6.

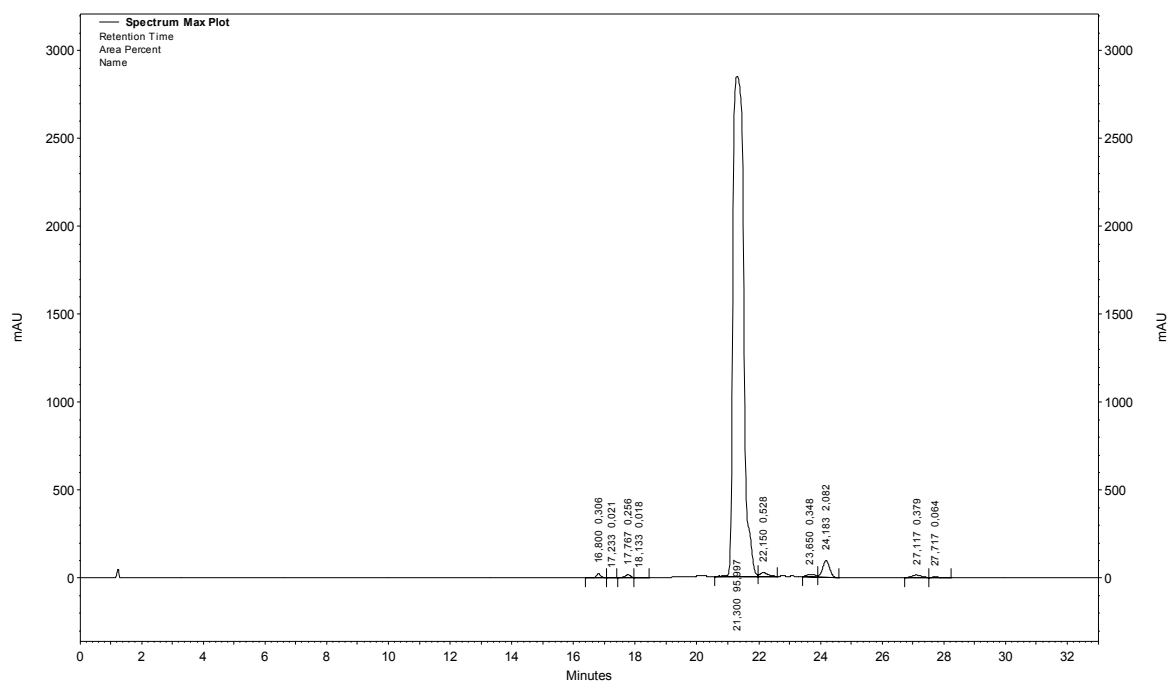

(ESI+) mass spectrum of cyanine amino-amide 6.

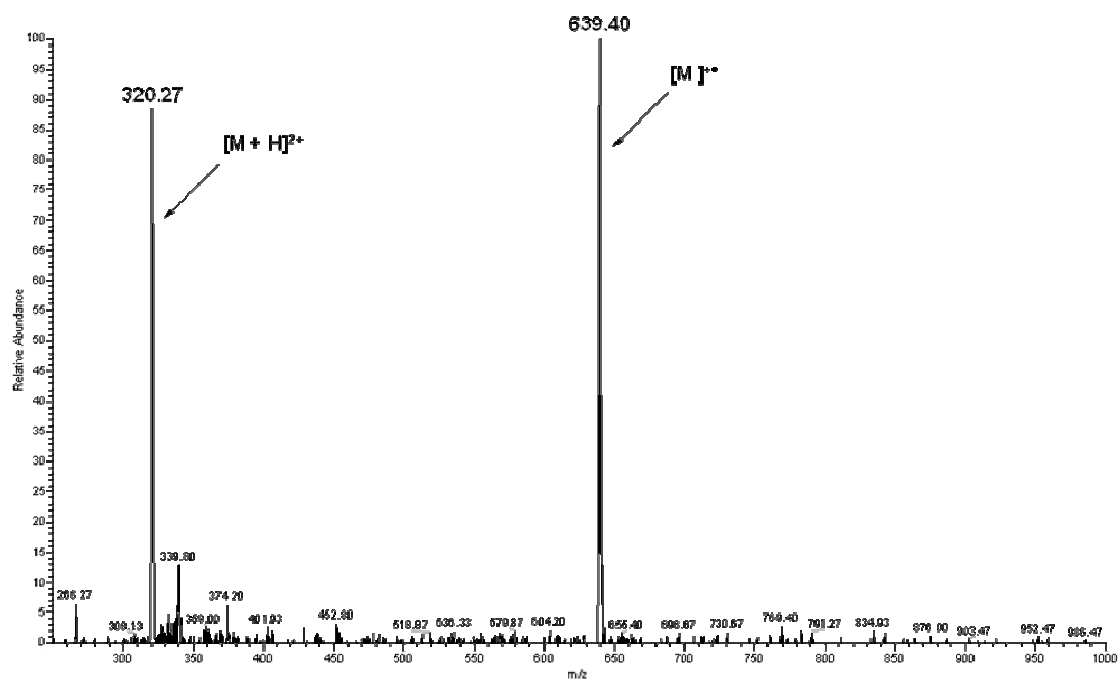

(ESI+) mass spectrum (high resolution) of cyanine amino-amide 6.

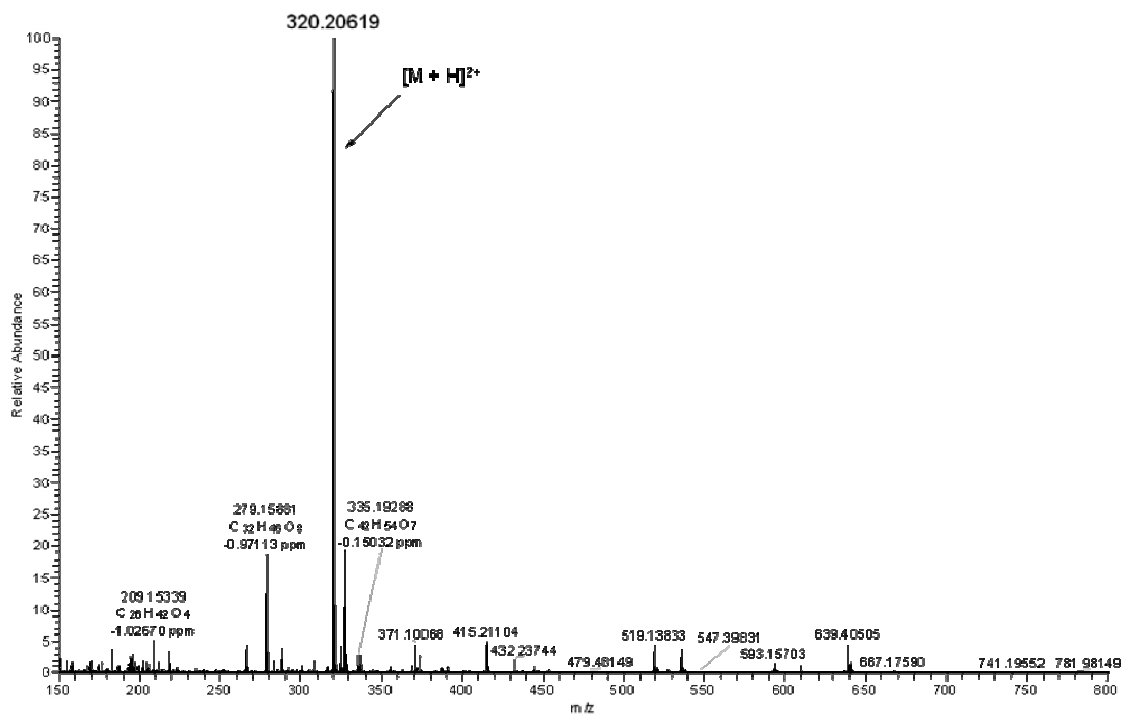

Normalised absorption (—), emission (—) (Ex. 600 nm) and excitation (—) (Em. 760 nm) spectra of cyanine amino-amide 6 in DMSO at 25 °C.

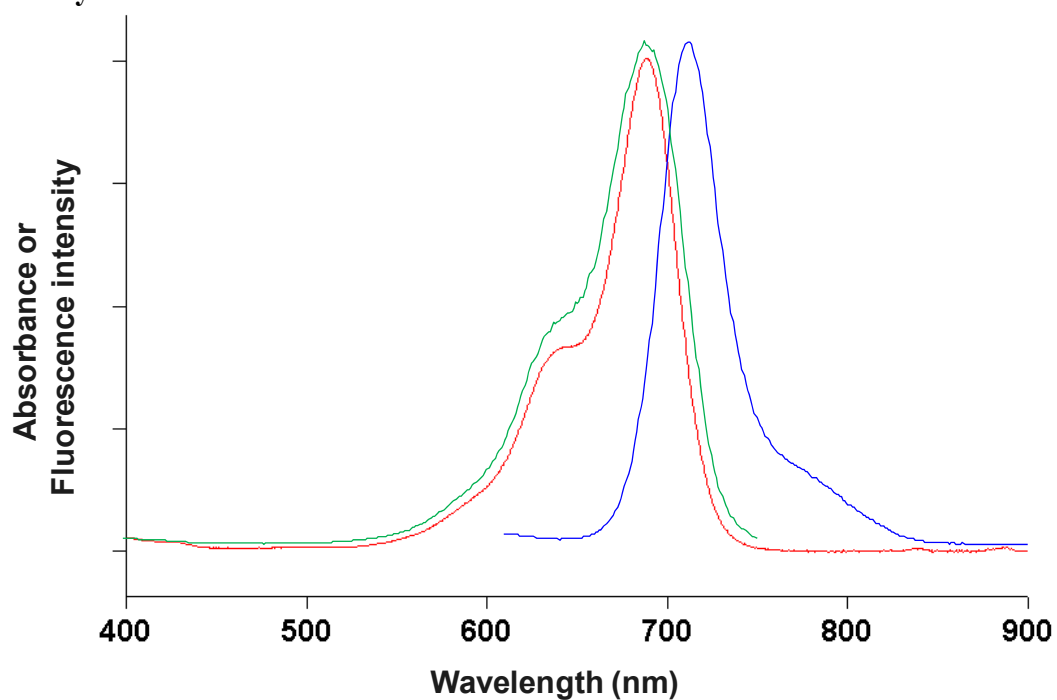

Normalised absorption (—), emission (—) (Ex. 600 nm) and excitation (—) (Em. 760 nm) spectra of cyanine amino-amide 6 in PBS + 5% BSA at 25 °C.

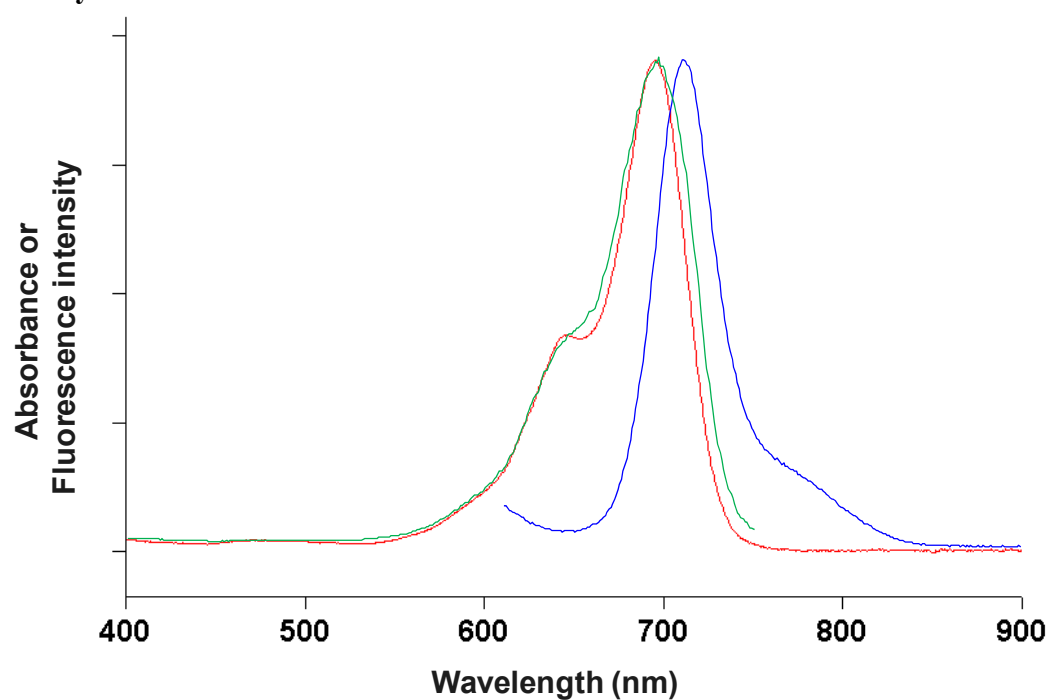

**<sup>1</sup>H NMR spectrum of fluoro-monosulfonated cyanine “cold” reference 7 (TFA salt) recorded in CDCl<sub>3</sub> at 300 MHz.**

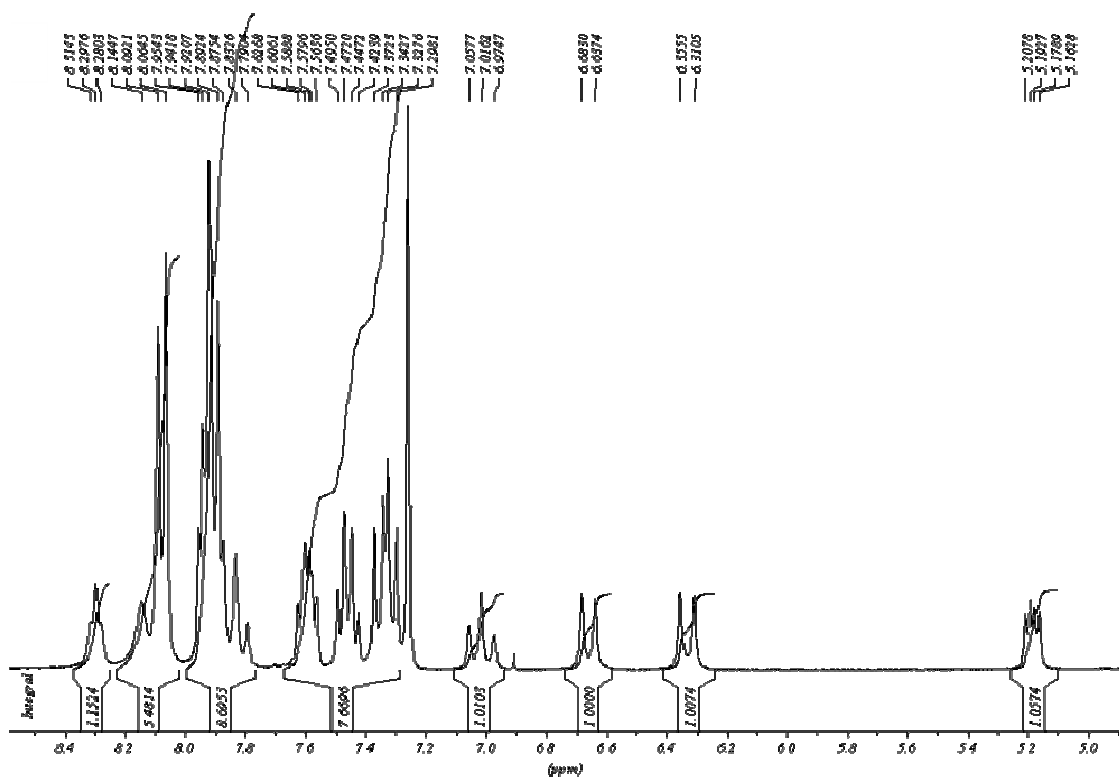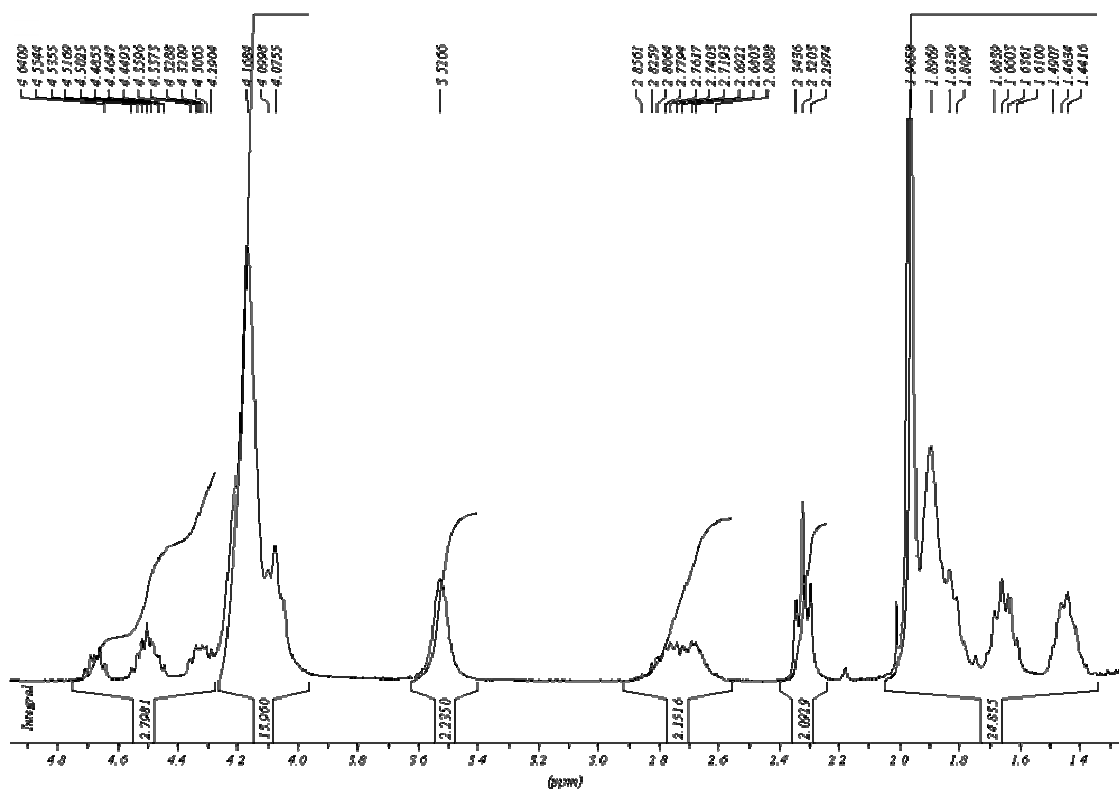

**$^{13}\text{C}$  NMR spectrum of fluoro-monosulfonated cyanine “cold” reference 7 (TFA salt)  
recorded in  $\text{CDCl}_3$  at 75.5 MHz.**

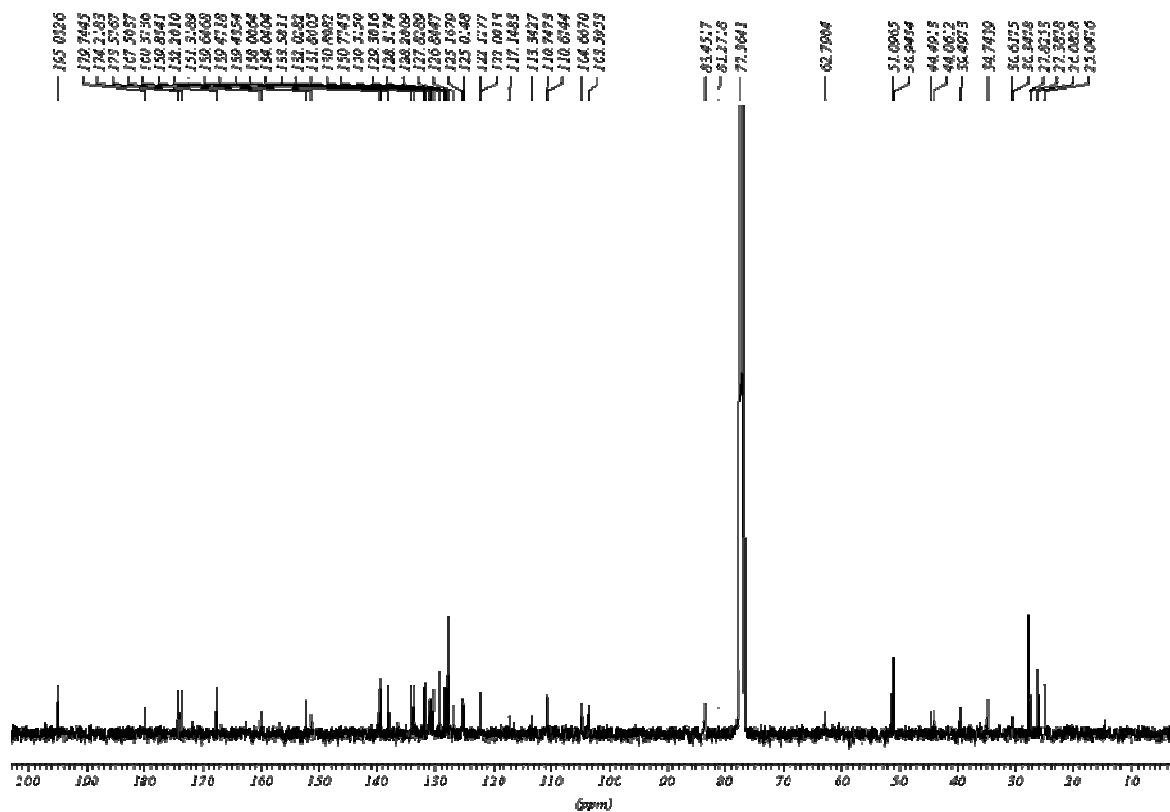

**$^{19}\text{F}$  NMR spectrum of fluoro-monosulfonated cyanine “cold” reference 7 (TFA salt)  
recorded in  $\text{CDCl}_3$  at 282.5 MHz.**

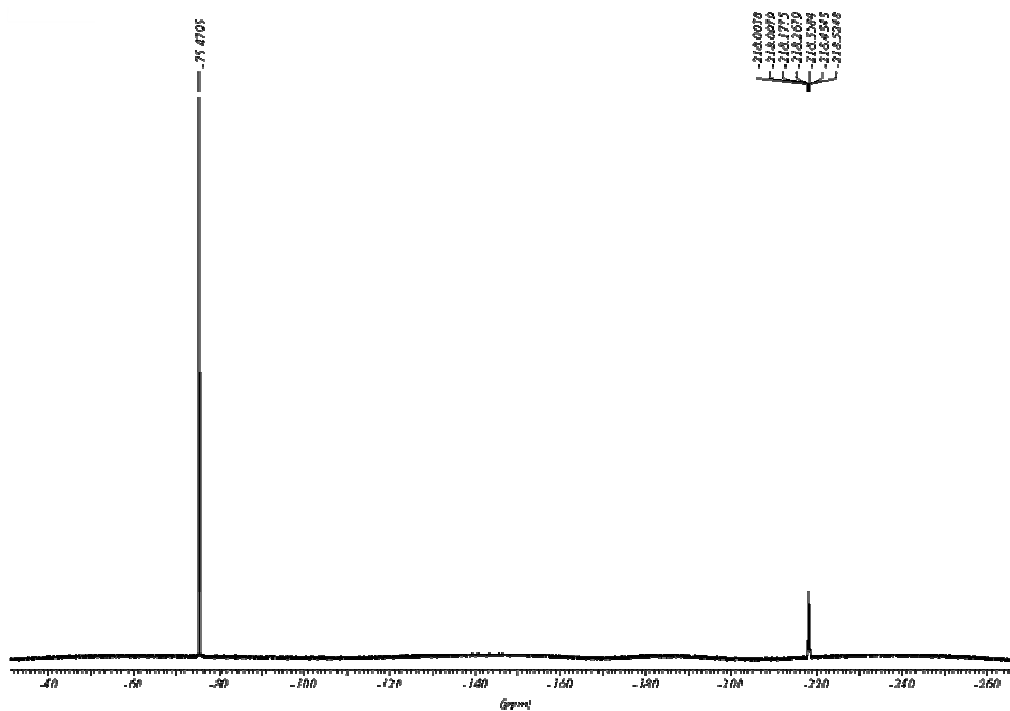



**RP-HPLC elution profile (system B) of fluoro-monosulfonated cyanine “cold” reference**  
7.

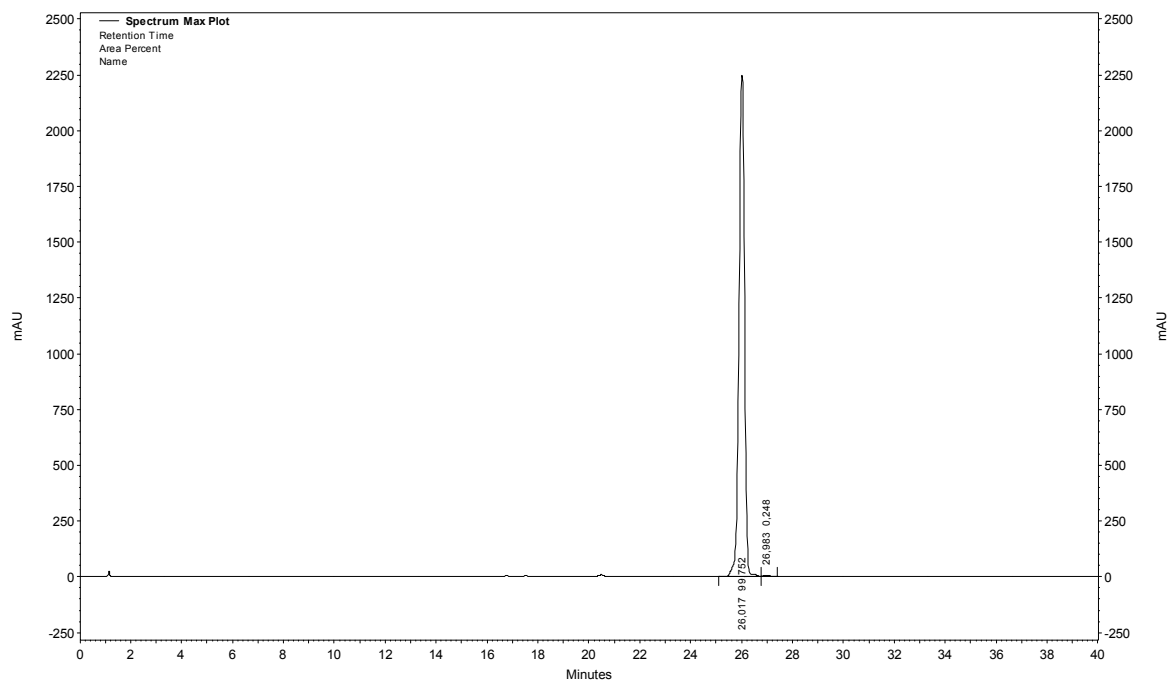

**RP-HPLC elution profile (system I) of fluoro-monosulfonated cyanine “cold” reference**  
7.

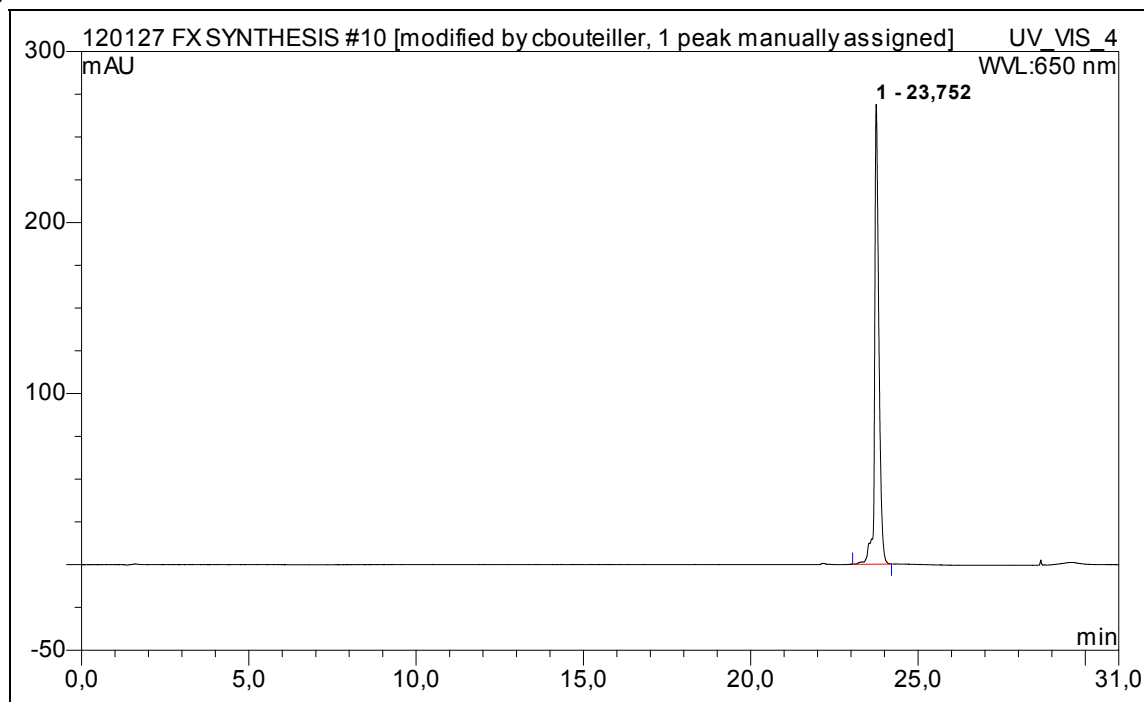

**(ESI-) mass spectrum of fluoro-monosulfonated cyanine “cold” reference 7.**

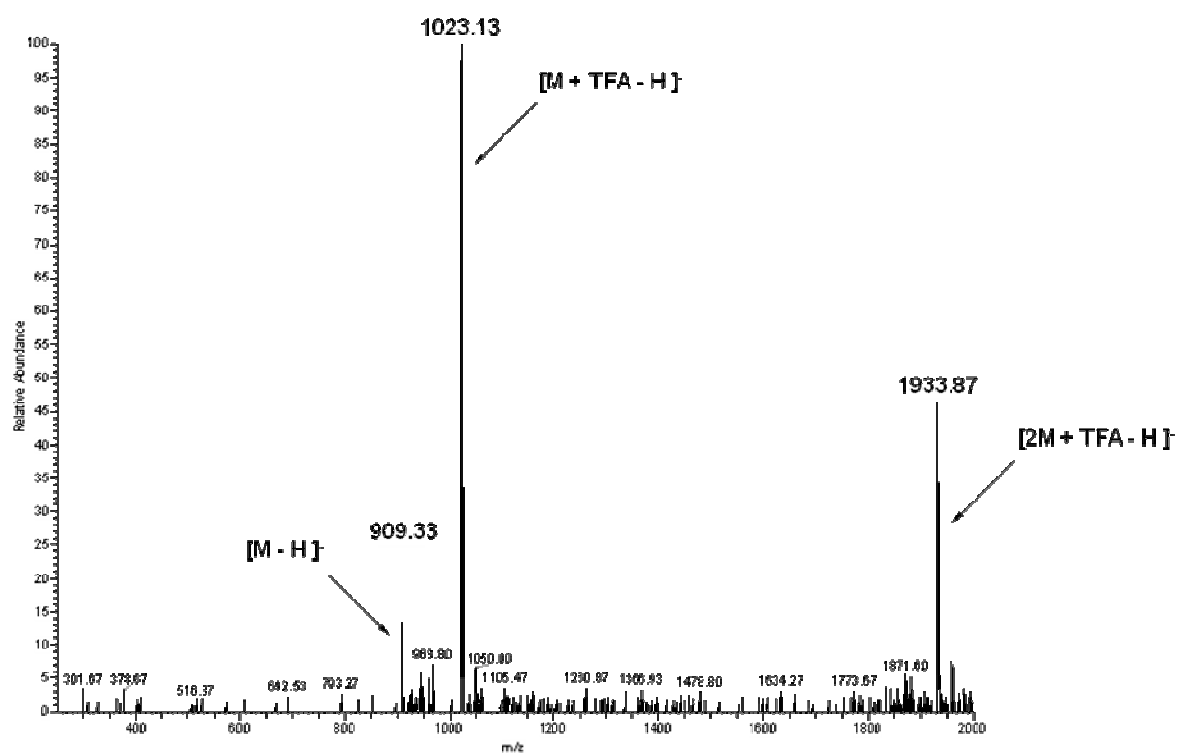

**(ESI+) mass spectrum of fluoro-monosulfonated cyanine “cold” reference 7.**

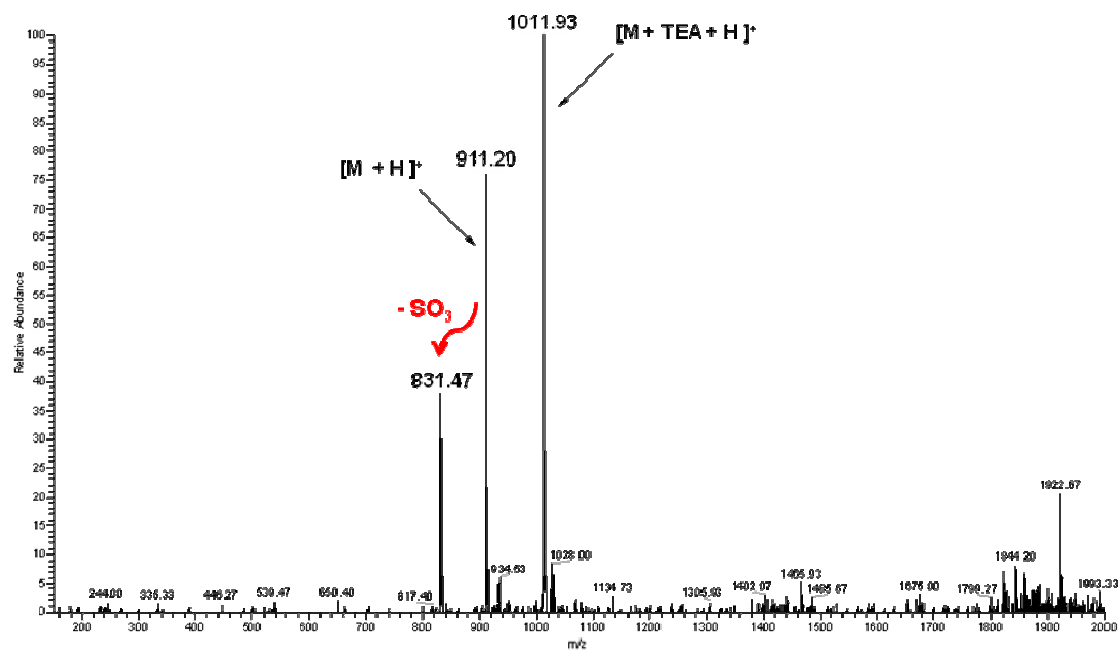

*The peak at m/z = 831.47 was assigned to the desulfonation derivative whose formation occurred during the ionisation process (ESI+).*

**(ESI+) mass spectrum (high resolution) of fluoro-monosulfonated cyanine “cold” reference 7.**

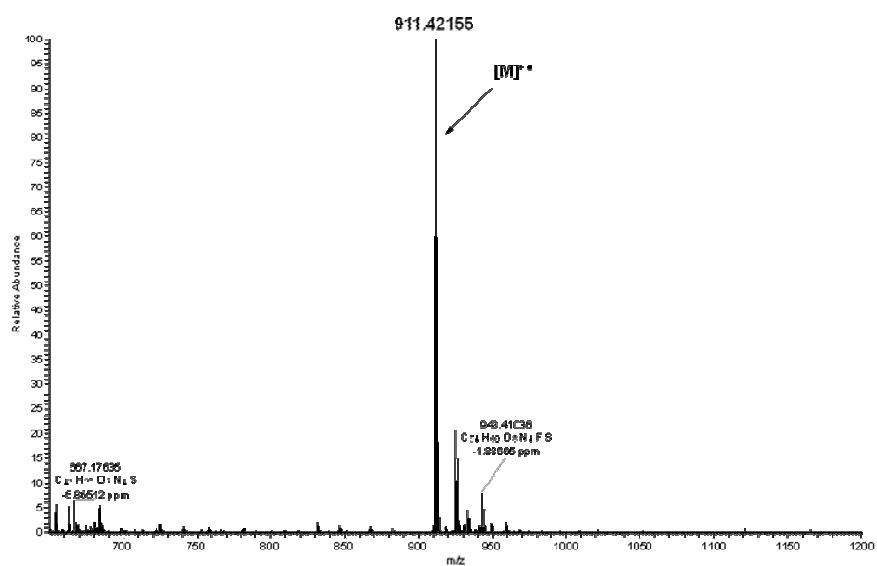

**RP-HPLC elution profile (system A) of fluoro-monosulfonated dodecapeptide “cold” reference 8.**

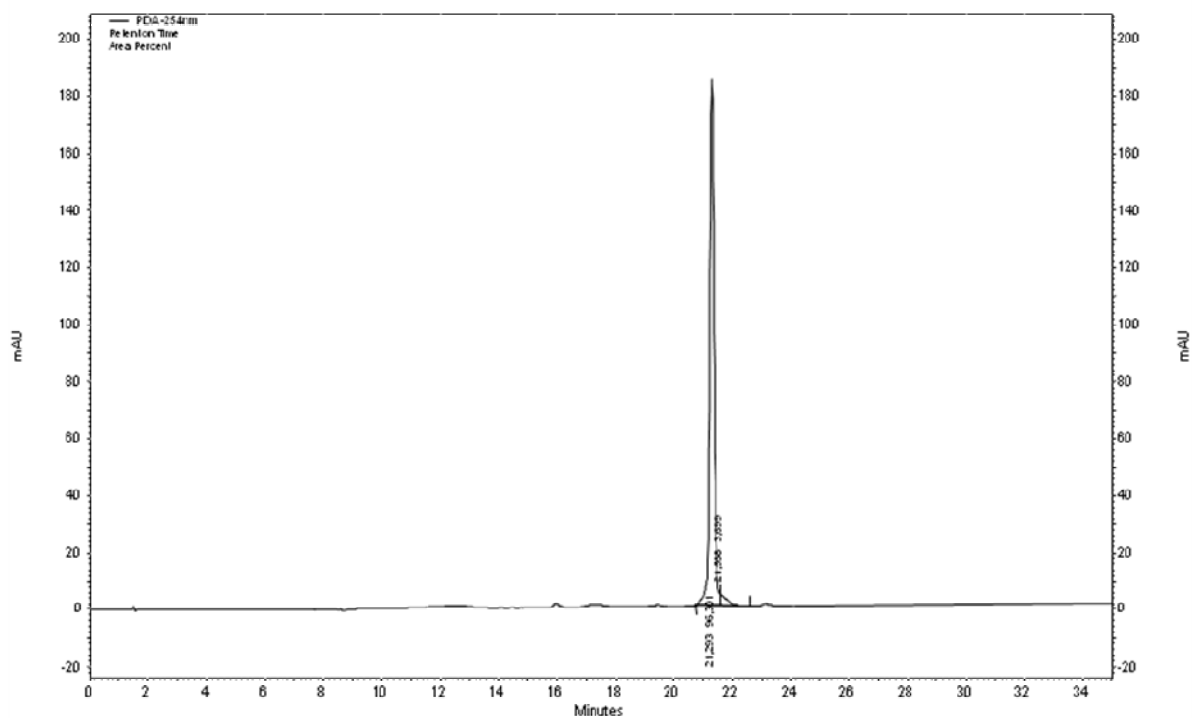

**RP-HPLC elution profile (system I) of fluoro-monosulfonated dodecapeptide “cold” reference 8.**

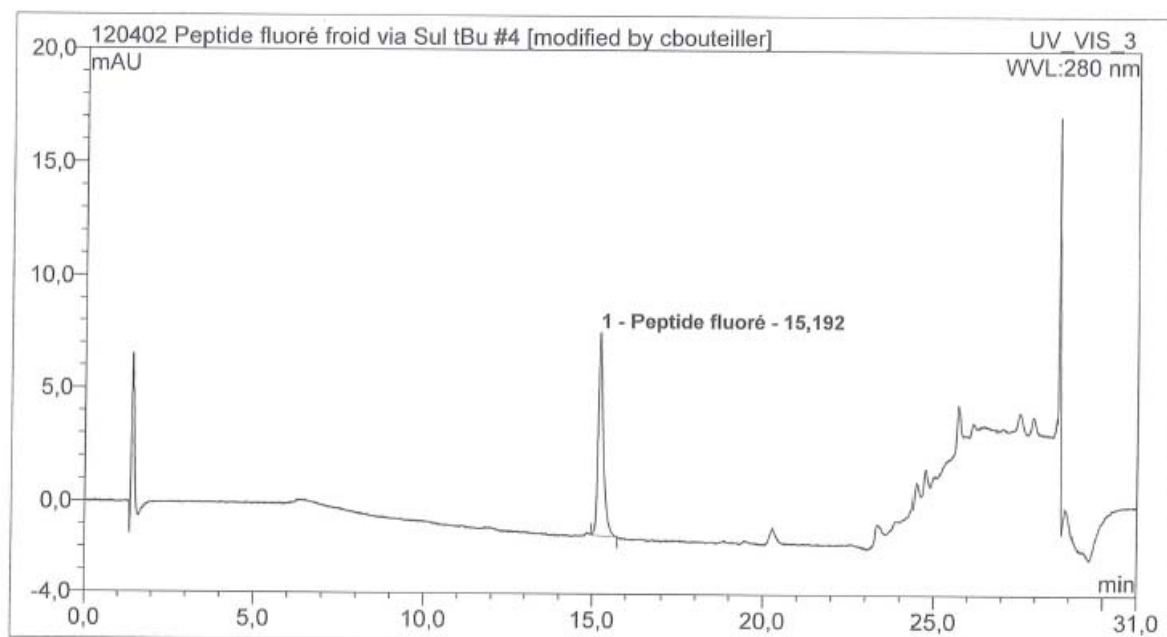

**(ESI+) mass spectrum of fluoro-monosulfonated dodecapeptide “cold” reference 8.**

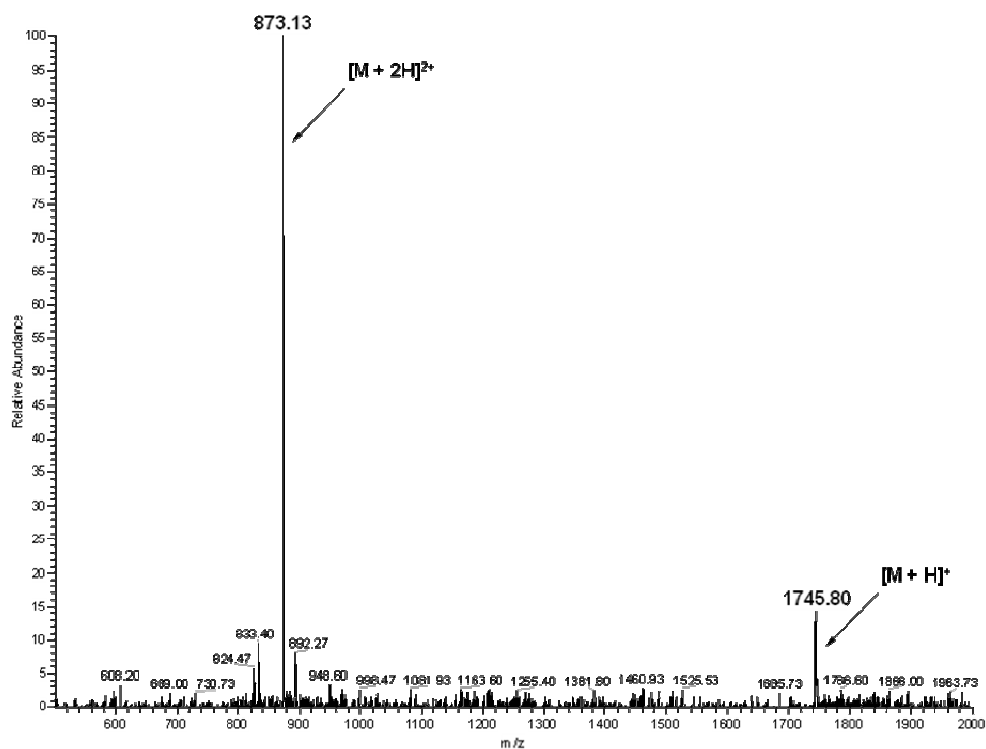

(ESI-) mass spectrum of fluoro-monosulfonated dodecapeptide “cold” reference 8.

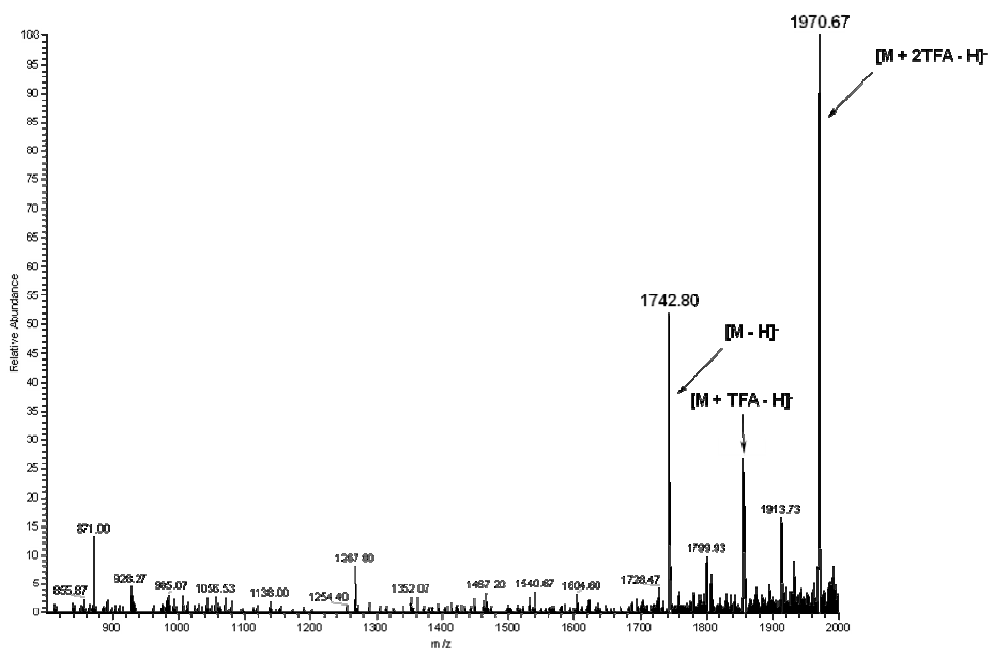

(ESI+) mass spectrum (high resolution) of fluoro-monosulfonated dodecapeptide “cold” reference 8.

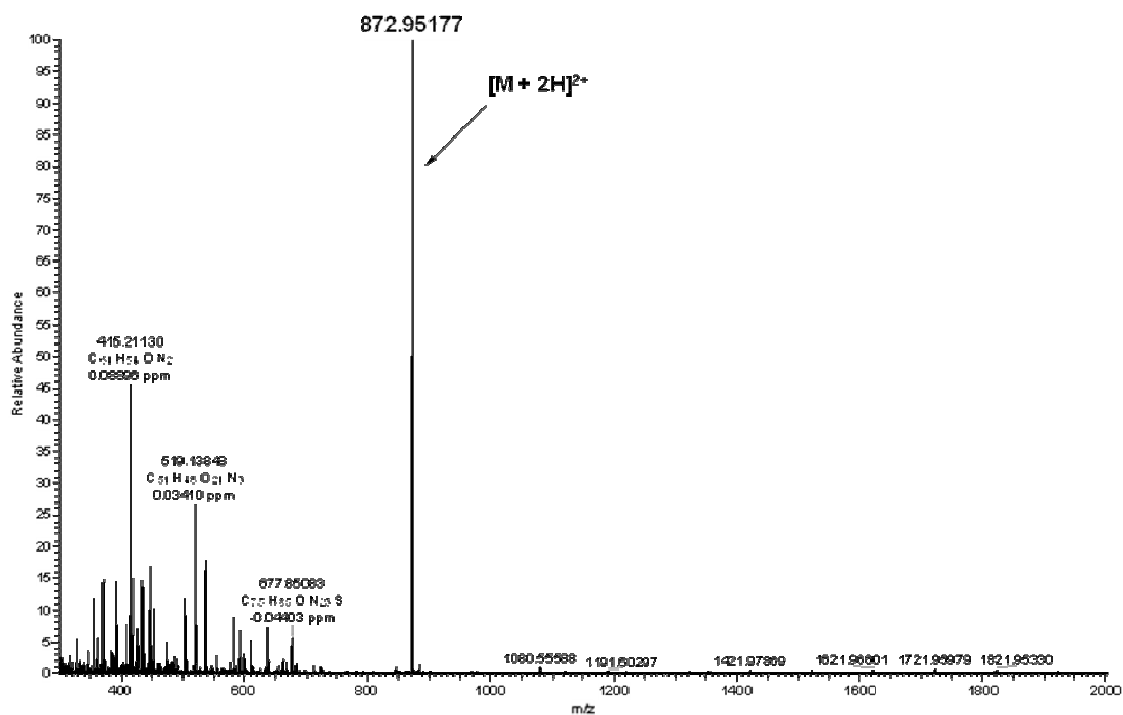

(ESI+) mass spectrum of dodecapeptide before derivatisation with [ $^{19}\text{F}$ ]-prosthetic group **1**<sup>a</sup>.

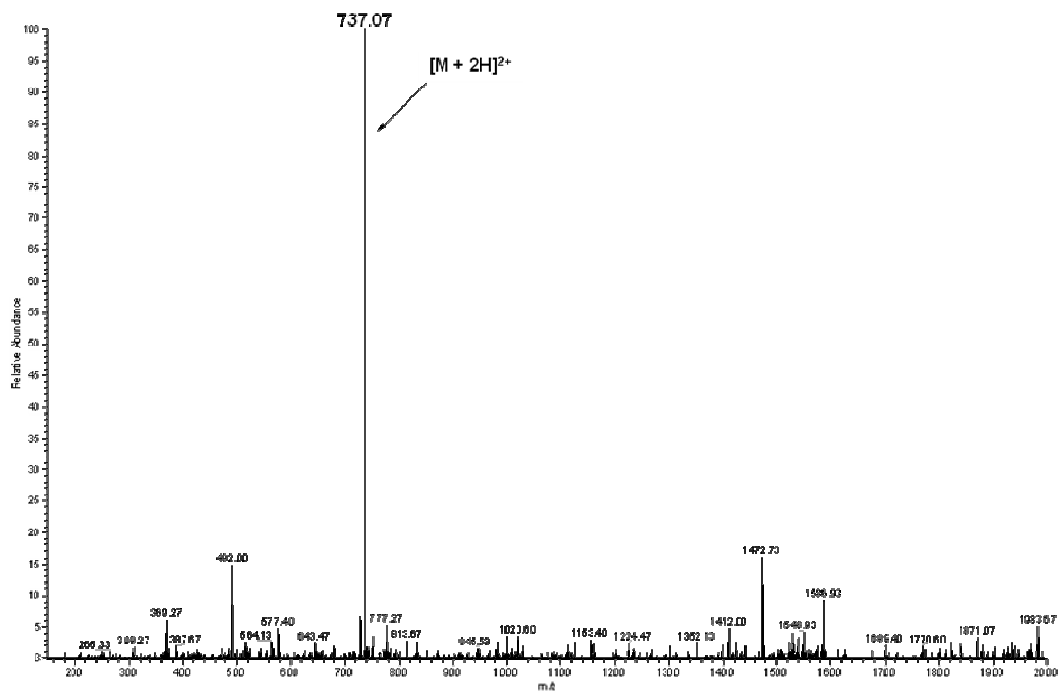

<sup>a</sup>The mass difference between this peptide and the “cold” reference **8** (*vide supra*) is 272 Da that corresponds to the derivatisation of its lysine residue with [ $^{19}\text{F}$ ]-prosthetic group **1**.
